# Supplementary material
Source: PubMed Central journal article supplement (PMC5446613)
Supplement: JB.00840-16_zjb999094415s1.pdf [file JB.00840-16_zjb999094415s1.pdf]

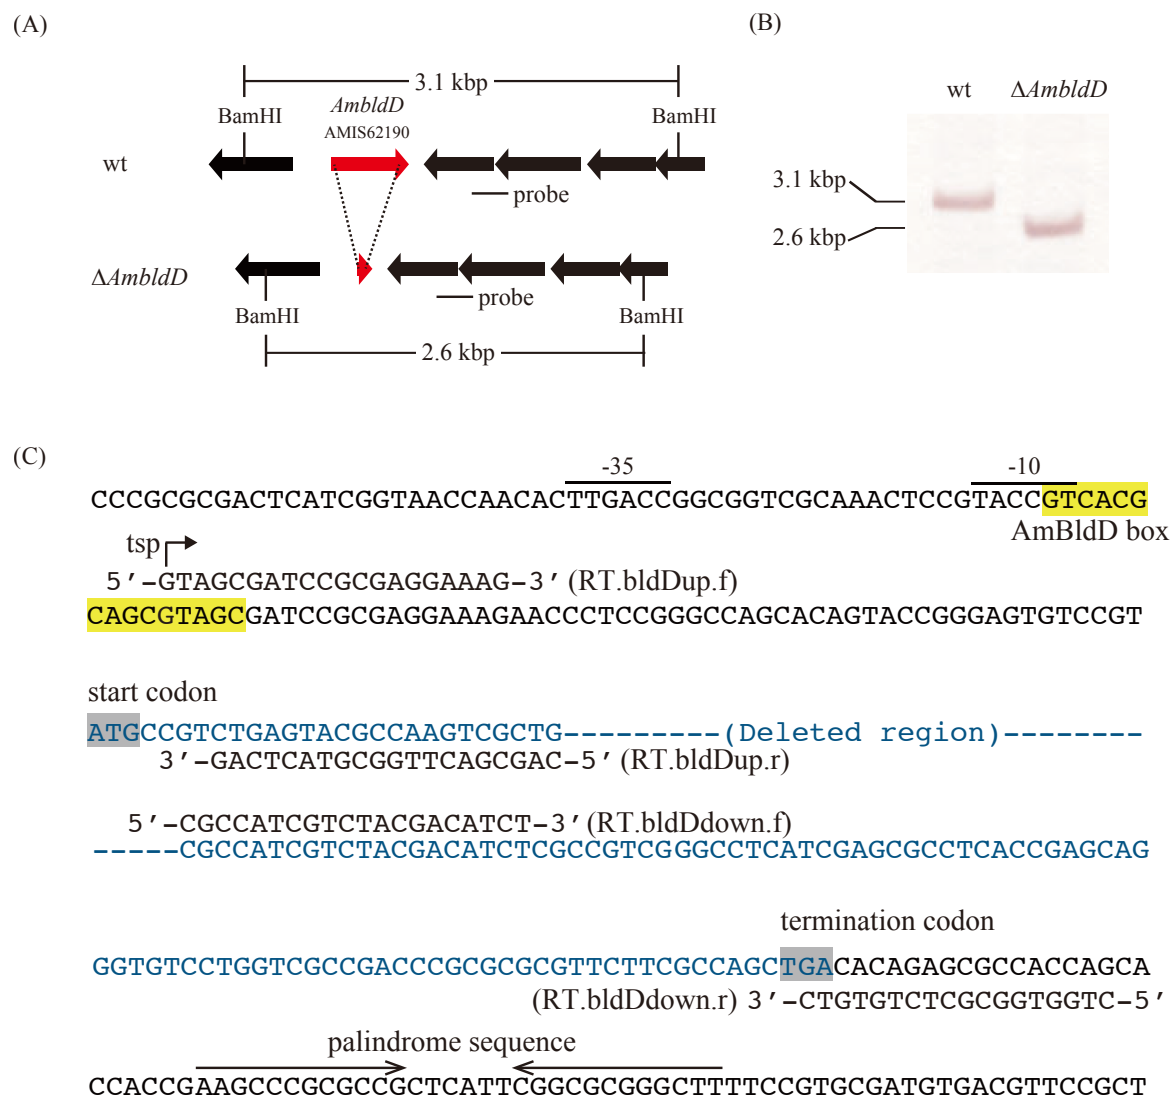

**Figure S1.** (A) Construction of the  $\Delta AmblD$  mutant. (B) Southern blotting using BamHI-digested genomic DNAs of the wild-type (wt) and  $\Delta AmblD$  strains. The probe position is shown in (A). (C) Nucleotide sequence of the *AmblD* locus in the  $\Delta AmblD$  strain. The hexameric -35 and -10 promoter sequences, transcription start point (tsp), start and termination codons, and AmBldD box are indicated. An inverted repeat sequence (palindrome sequence) that may serve as a transcription terminator is also indicated. Primers used for the qRT-PCR analysis in Table 2 and Fig. S7 are also indicated; RT.bldDup.f and RT.bldDup.r were used for the amplification of “AmblD upstream” and RT.bldDdown.f and RT.bldDdown.r were used for that of “AmblD downstream” .

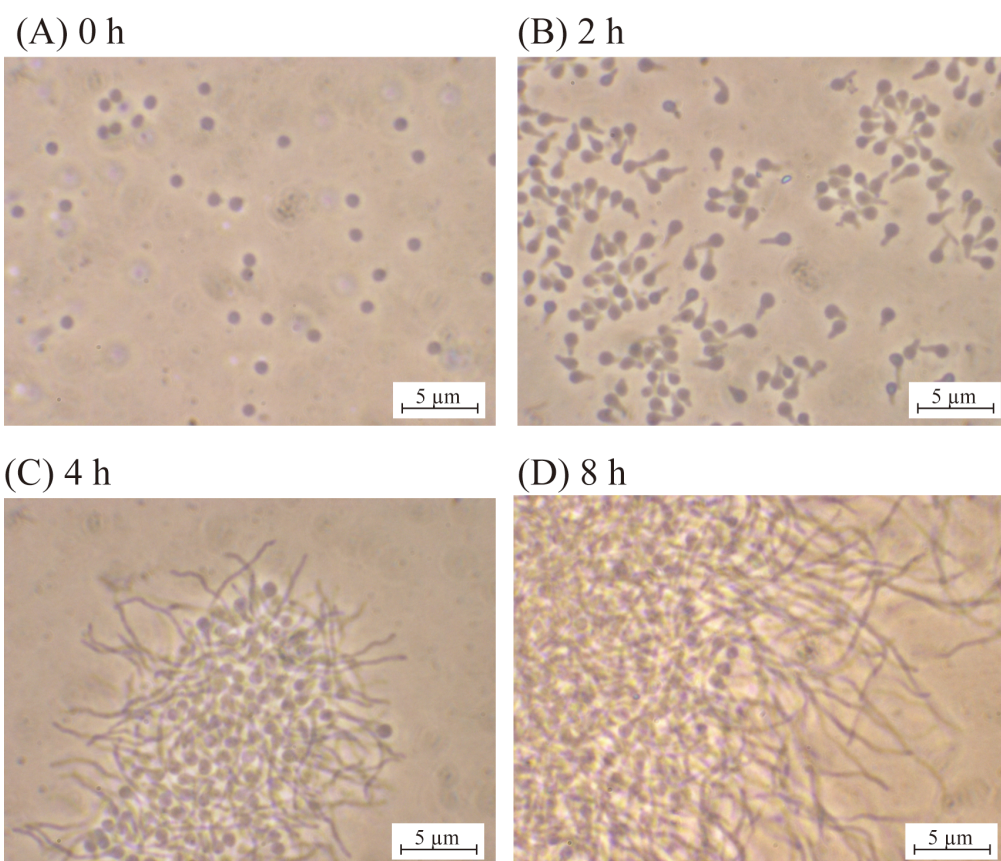

**Figure S2.** Light microscope observations of germinating cells. Zoospores were collected and shaken in PYM liquid at 30°C for (A) 0, (B) 2, (C) 4 and (D) 8 h.

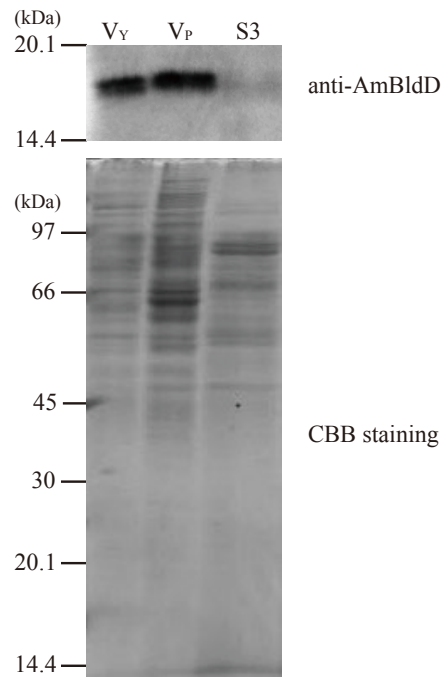

**Figure S3.** Protein levels of AmBldD. Protein concentrations were determined by the Bradford assay and equal amounts of proteins were used for SDS-PAGE. AmBldD was detected using the anti-AmBldD polyclonal antibody (upper panel). A CBB-stained gel is shown in the lower panel. Protein samples were prepared from vegetative mycelia grown on YBNM agar (V<sub>Y</sub>) and in PYM liquid (V<sub>P</sub>) at 30°C for 48 h, mixtures of substrate mycelium and immature sporangia grown on HAT agar at 30°C for 3 days (S3).

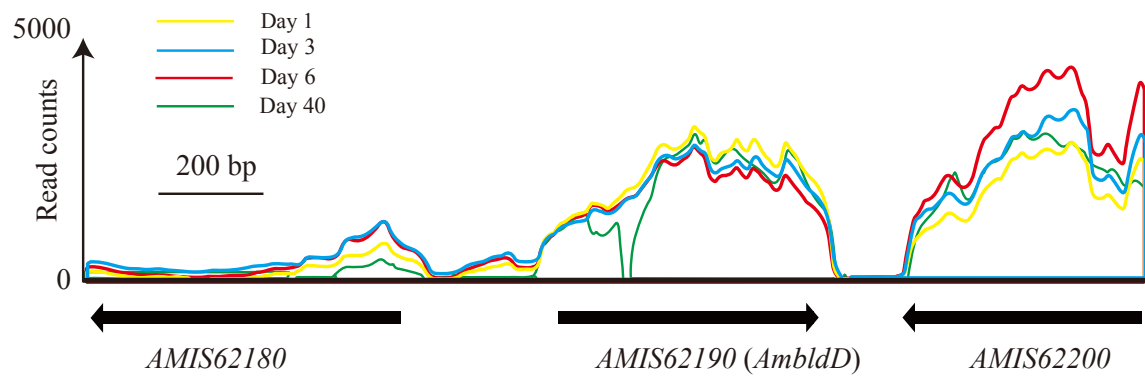

**Figure S4.** Transcription profiles of *AMIS62180*, *AMIS62190 (AmblD)* and *AMIS62200*. Yellow, blue, red and green lines indicate the distributions of the mapped read counts in the 1-, 3-, 6- and 40-day cultures, respectively. Arrows indicate the open reading frames.

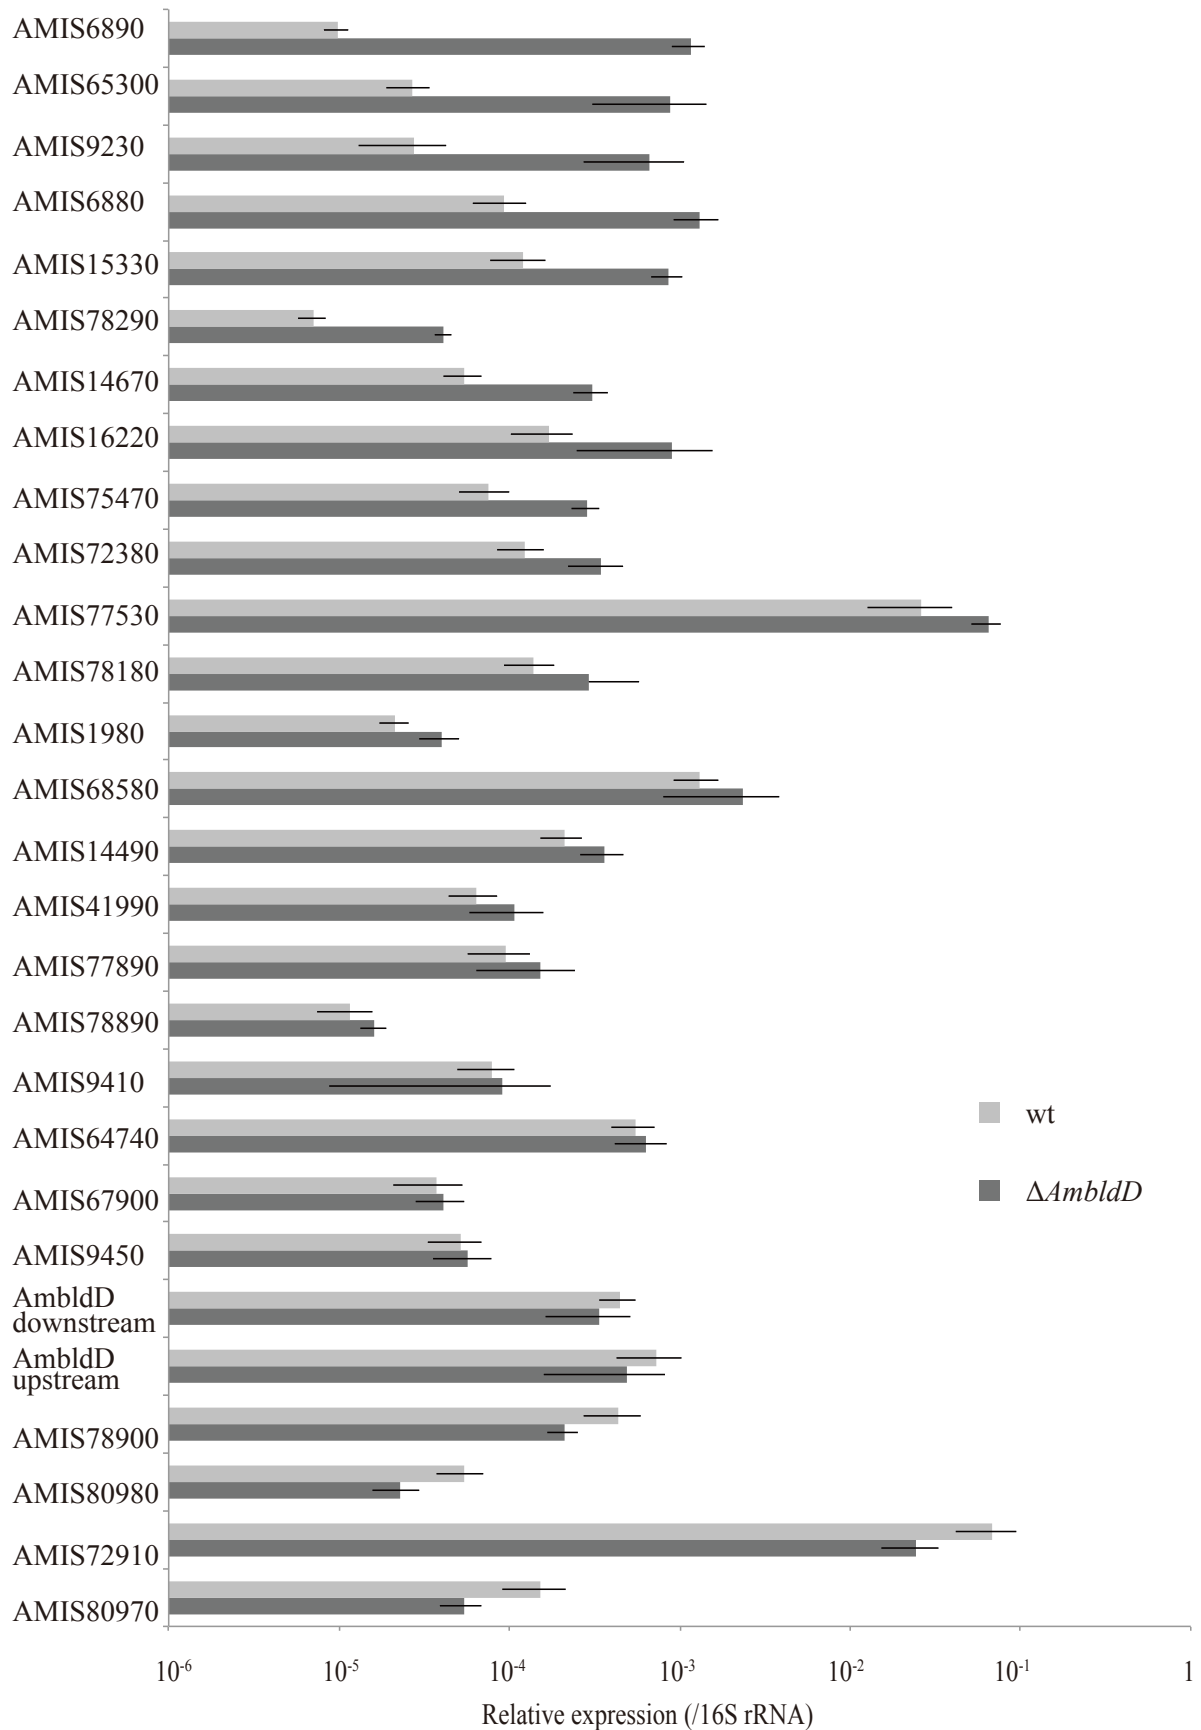

**Figure S5.** Analysis of gene transcript levels to identify genes regulated by AmBlD. A qRT-PCR analysis of 27 genes was performed using the total RNAs extracted from the wt and  $\Delta AmblD$  strains grown in YBNM agar medium at 30°C for 2 days. The *AmblD* transcript was analyzed by two primer sets; one is for the 5' region of *AmblD* (AmblD upstream) and the other is for the 3' region (AmblD downstream). See Fig. S1(C) for the amplification regions. The data are means of three biological replicates  $\pm$  standard deviations.

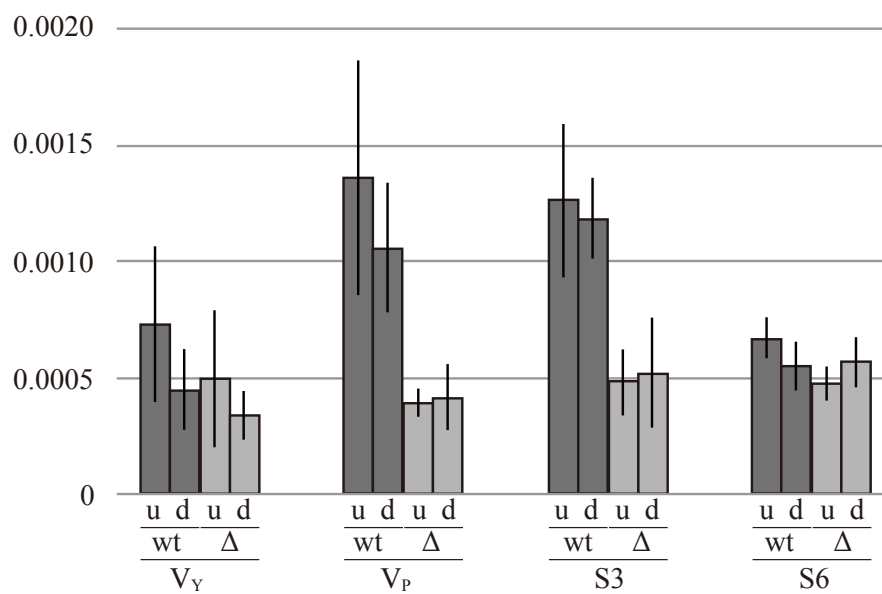

**Figure S6.** Transcript levels of *AmbldD*. Transcripts of *AmbldD* in the wild-type (wt) and  $\Delta$  *AmbldD* ( $\Delta$ ) were measured by qRT-PCR amplifying “*AmbldD* upstream” (u) and “*AmbldD* downstream” (d). See Fig. S1(C) for the amplification regions. RNA samples were prepared from vegetative mycelia grown on YBNM agar (V<sub>Y</sub>) and in PYM liquid (V<sub>P</sub>) at 30°C for 48 h, mixtures of substrate mycelium and (immature) sporangia grown on HAT agar at 30°C for 3 and 6 days (S3 and S6).

**Table S1.** Primers used in this study.

| Primer name   | Sequence (5' to 3')           | Used for           |
|---------------|-------------------------------|--------------------|
| pColdI-BldD.f | TCGAATTCGACGGGTCGTTAAAGGATGTC | Protein expression |
| pColdI-BldD.r | TCTCTAGACCCGCGCTTCCTCAACGGTC  | Protein expression |
| sRT.16SrRNA.f | AGAGTTTGATCCTGGCTCAG          | Semi-qRT-PCR       |
| sRT.16SrRNA.r | GGTACCTTGTACGACTT             | Semi-qRT-PCR       |
| sRT.bldD.f    | GCGTCGAAGAGAAGTCCAAC          | Semi-qRT-PCR       |
| sRT.bldD.r    | CGAGATGTCGTAGACGATGG          | Semi-qRT-PCR       |
| RT.16SrRNA.f  | CAGTCGTGTCGTGAGATGT           | qRT-PCR            |
| RT.16SrRNA.r  | AAGGGGCATGATGACTTGAC          | qRT-PCR            |
| RT.bldDup.f   | GTAGCGATCCGCGAGGAAAG          | qRT-PCR            |
| RT.bldDup.r   | CAGCGACTTGCGTACTCAG           | qRT-PCR            |
| RT.bldDdown.f | CGCCATCGTCTACGACATCT          | qRT-PCR            |
| RT.bldDdown.r | CTGGTGGCGCTCTGTGTC            | qRT-PCR            |
| RT.1980.f     | ACACTGGAGATCGTCTGCTGA         | qRT-PCR            |
| RT.1980.r     | ACCTCGGACTCGCGGAATC           | qRT-PCR            |
| RT.6880.f     | ATGTCGAACGTTCCGAGACT          | qRT-PCR            |
| RT.6880.r     | CGCACATCGTCTTTGCCTTG          | qRT-PCR            |
| RT.6890.f     | GTCCTCGTGTGCGTCCGAAC          | qRT-PCR            |
| RT.6890.r     | CCGTTCCGCCAGTCCGATCATG        | qRT-PCR            |
| RT.65300.f    | AGTACCATTCGTCCAACGAC          | qRT-PCR            |
| RT.65300.r    | TGCGTGGAACAACACATGGAC         | qRT-PCR            |
| RT.72910.f    | ACTGGCGTCACGATGCGATC          | qRT-PCR            |
| RT.72910.r    | GAGAGGCACGACTCGGTCAC          | qRT-PCR            |
| RT.78290.f    | GTTTACCGATGGGGATGATC          | qRT-PCR            |
| RT.78290.r    | GTCGGCGAGGCACTCGTAGC          | qRT-PCR            |
| RT.9230.f     | CAGATCGCTGACGAGTTGTG          | qRT-PCR            |
| RT.9230.r     | CACACGTTCCATGGTCTGAG          | qRT-PCR            |
| RT.9410.f     | GTTTCGACTCGATGGAGCAGT         | qRT-PCR            |
| RT.9410.r     | TGTGCGAGTGGTAGATGACC          | qRT-PCR            |
| RT.9450.f     | CGTGTACGTACGTGGTGGTC          | qRT-PCR            |
| RT.9450.r     | GCCCGTAGAAGGTGTAGACG          | qRT-PCR            |
| RT.14490.f    | GATCATCGTTTGCCGGATT           | qRT-PCR            |
| RT.14490.r    | ATCTGACCCTTGCGGTAGTG          | qRT-PCR            |
| RT.14670.f    | GGTGATCGGTGTGGACATTC          | qRT-PCR            |
| RT.14670.r    | GAAGTCCTGCTCCATCCAGA          | qRT-PCR            |
| RT.15330.f    | CGAGTACGATCAGTCGCTCA          | qRT-PCR            |
| RT.15330.r    | GCTCGAGCAGGTTGTTGG            | qRT-PCR            |
| RT.16220.f    | GCAGAAGGTTCCGTTACGAC          | qRT-PCR            |
| RT.16220.r    | TTACCGACGTACTIONCGATCACC      | qRT-PCR            |
| RT.41990.f    | ACCGAGTCCCTGTCTTCT            | qRT-PCR            |
| RT.41990.r    | TGTCCTCGAAGATGATGACC          | qRT-PCR            |
| RT.64740.f    | CGAGTGCACACCTTCATC            | qRT-PCR            |
| RT.64740.r    | GCACTCGAGGTTCTCGTTGT          | qRT-PCR            |
| RT.67900.f    | GAGTGCCCCGGAAAATCT            | qRT-PCR            |
| RT.67900.r    | CCATCACACGCACCCTCT            | qRT-PCR            |
| RT.68580.f    | GTCTAGCAGCCGATGAACG           | qRT-PCR            |
| RT.68580.r    | GGCCGCAGAACAAGAT              | qRT-PCR            |
| RT.72380.f    | GTCAACGATGTGCTGACGAG          | qRT-PCR            |
| RT.72380.r    | ATCCCGATGCTGTGATAAG           | qRT-PCR            |
| RT.75470.f    | TCGTCCTGGTCGACTTCTG           | qRT-PCR            |
| RT.75470.r    | GTGATCTCGGGGTGCTTCT           | qRT-PCR            |

|                 |                               |                      |
|-----------------|-------------------------------|----------------------|
| RT.77530.f      | GGCAATCGAGACTAGGGTCA          | qRT-PCR              |
| RT.77530.r      | ACCTCTTCGGCGTTCTCAG           | qRT-PCR              |
| RT.77890.f      | AACAGCTCACTCGACGTGGT          | qRT-PCR              |
| RT.77890.r      | AGTGGCGATCATCGGTAAAC          | qRT-PCR              |
| RT.78180.f      | GGAGATGGACACGATCGAAG          | qRT-PCR              |
| RT.78180.r      | TCTTCCCGGACAGAACGATA          | qRT-PCR              |
| RT.78890.f      | CTCCGCTTTAGGATGCATGT          | qRT-PCR              |
| RT.78890.r      | AGCAGAATGCGGAGAACG            | qRT-PCR              |
| RT.80970.f      | CTACAGAGGCGAGCAGTCCCT         | qRT-PCR              |
| RT.80970.r      | GGTATGTAGCCGCGTTTCTC          | qRT-PCR              |
| RT.80980.f      | GCTGTACCCGACACTGAAGC          | qRT-PCR              |
| RT.80980.r      | CTTCGGCCGTGATCTTGTAG          | qRT-PCR              |
| ΔbldD.up.f      | TCGAATTCGCTCCGGCAGTTTGCTCATC  | Gene deletion        |
| ΔbldD.up.r      | TCGCTAGCCAGCGACTTGGCGTACTCAG  | Gene deletion        |
| ΔbldD.down.f    | TCGCTAGCGCGCTCGCCATCGTCTACGAC | Gene deletion        |
| ΔbldD.down.r    | TCAAGCTTCTGGTCGAGATGTGCCAGAC  | Gene deletion        |
| bldD.southern.f | GGTTGAGCACCAGGCCGTTCC         | Southern blotting    |
| bldD.southern.r | CTGGTCGAGATGTGGCCAGAC         | Southern blotting    |
| bldD-5'RACE-RT  | CGCTGCTGCTGGATG               | 5'-RACE              |
| bldD-5'RACE-A1  | CGCTGCTGCTGGATG               | 5'-RACE              |
| bldD-5'RACE-S1  | GGCCGACTTCTACCGAGTGC          | 5'-RACE              |
| bldD-5'RACE-A2  | TCGAATTCGACTTCTCTTCGACGCCCTG  | 5'-RACE              |
| bldD-5'RACE-S2  | TCAAGCTTGAGAAGCTCTACGACACCAC  | 5'-RACE              |
| whiD.5race.RT   | CGCACATCGTCTTTG               | 5'-RACE              |
| whiD.1st.S1     | ATCGCCGACCTTTGGGACTG          | 5'-RACE              |
| whiD.1st.A1     | CGAACGTTTCGACATCAACAC         | 5'-RACE              |
| whiD.2nd.S2     | CAACGACTGGGCAATTGCCG          | 5'-RACE              |
| whiD.2nd.A2     | CGCGGAGTGTTTCGTCTGAG          | 5'-RACE              |
| ssgB.5race.RT   | GAAAGACCAGCTCAC               | 5'-RACE              |
| ssgB.1st.S1     | CGTACGCGGTCCATGTGTTG          | 5'-RACE              |
| ssgB.1st.A1     | CTGGGTTCGTACCCGAGACTG         | 5'-RACE              |
| ssgB.2nd.S2     | CCACGCAGAATCAGCCGGTG          | 5'-RACE              |
| ssgB.2nd.A2     | GCCGTTCGCGTCAGGCGCTAC         | 5'-RACE              |
| wblA.5race.RT   | GCACTCGTAGCGAAC               | 5'-RACE              |
| wblA.1st.S1     | TGACGCGCTGTTCGTGCAGG          | 5'-RACE              |
| wblA.1st.A1     | ACTCTGACACGCCGCCATGC          | 5'-RACE              |
| wblA.2nd.S2     | AACGTGGCGAAGAGGATCTG          | 5'-RACE              |
| wblA.2nd.A2     | AGTCGCTGATCATCCCCATC          | 5'-RACE              |
| EMSA.bldD.f     | GACCATGGTGACGTGCCTGAC         | EMSA                 |
| EMSA.bldD.r     | CAGCGACTTGGCGTACTCAG          | EMSA                 |
| EMSA.A.f        | CAGACGATCTCCAGTGTCCACAAC      | EMSA                 |
| EMSA.A.r        | CTTCACGCCCGGTAGCGGCGAATG      | EMSA                 |
| EMSA.B.f        | ACACGCACCATGTTCGATGTCTTC      | EMSA                 |
| EMSA.B.r        | CCGTTCCGCCAGTCGGATCATG        | EMSA                 |
| EMSA.C.f        | GAACCGAGTACCTGGGCAGAAC        | EMSA                 |
| EMSA.C.r        | GTTGGACGAATGGTACTCATG         | EMSA                 |
| sense.f         | GGATACAGCCGGTAACTTTG          | DNase I footprinting |
| sense.r         | CATACGGACACTCCCGGTAC          | DNase I footprinting |
| anti-sense.f    | GACGGGTCGTTAAAGGATGTC         | DNase I footprinting |
| anti-sense.r    | AGCCCACGACGACAGCCTTC          | DNase I footprinting |



**Table S2.** Zoospore-specific protein.

| Spot   | ORF no <sup>a</sup> | Gene product <sup>b</sup>                                                                |
|--------|---------------------|------------------------------------------------------------------------------------------|
| 1      | AMIS54020           | putative ATPase associated with various cellular activities                              |
| 2      | AMIS37330           | putative xylulose-5-phosphate/fructose-6-phosphate phosphoketolase                       |
| 3      | AMIS37880           | putative catalase                                                                        |
| 4      | AMIS64930           | putative multi-sensor signal transduction histidine kinase                               |
| 5      | AMIS68770           | putative methyl-accepting chemotaxis protein                                             |
| 6      | AMIS65800           | hypothetical protein                                                                     |
| 7, 28  | AMIS49400           | putative ABC transporter ATP-binding protein                                             |
| 8      | AMIS73730           | putative modulator of DNA gyrase                                                         |
| 9      | AMIS58720           | putative UDP-N-acetylglucosamine 2-epimerase                                             |
| 10     | AMIS56730           | putative aminotransferase                                                                |
| 11     | AMIS30              | putative 6-phosphogluconate dehydrogenase                                                |
| 12, 13 | AMIS68250           | hypothetical protein                                                                     |
| 14     | AMIS61390           | hypothetical protein                                                                     |
| 15     | AMIS75470           | putative thioredoxin                                                                     |
| 16, 24 | AMIS80500           | putative OsmC-like protein                                                               |
| 17     | AMIS72590           | putative ATP-dependent Clp protease proteolytic subunit                                  |
| 18     | AMIS10090           | hypothetical protein                                                                     |
| 19     | AMIS66160           | hypothetical protein                                                                     |
| 20     | AMIS54570           | putative maltokinase                                                                     |
| 21     | AMIS76190           | putative flagellin domain protein                                                        |
| 22     | AMIS80580           | hypothetical protein                                                                     |
| 23     | AMIS76490           | putative response regulator receiver domain protein CheY                                 |
| 25     | AMIS76580           | putative two-component system response regulator                                         |
| 26     | AMIS68430           | putative methylenetetrahydrofolate dehydrogenase/methenyltetrahydrofolate cyclohydrolase |
| 27     | AMIS4650            | putative serine hydroxymethyltransferase                                                 |
| 29     | AMIS1780            | hypothetical protein                                                                     |
| 30     | AMIS37910           | hypothetical protein                                                                     |

**a.** A total of 27 proteins were identified by peptide mass fingerprinting from the 30 spots indicated in Fig. 1A. AMIS49400, AMIS68250 and AMIS80500 were identified from two spots each.

**b.** Possible functions and classifications of the identified proteins are shown.

All these 'zoospore-specific' protein genes, except *AMIS75470*, are not the direct targets of AmBldD.

**Table S3.** AmBldD-binding sites detected by ChIP-seq analysis with a strict threshold (p-value < 0.0005).

| No. | Region           | MEME p-value | Upstream   | BldD box            | downstream  |
|-----|------------------|--------------|------------|---------------------|-------------|
| 1   | 1009746..1010015 | 1.05E-05     | CAACGCCGAC | GGGTCACTGGACGTAACGA | GAGAATTCGT  |
| 2   | 1047431..1047732 | 3.07E-06     | GGGGCCTTTT | TCGTTACTGCCTGTGATCA | GGGGGCCGTG  |
| 3   | 1056800..1057128 | 1.05E-05     | AAGATCTGCA | ACATTACATTCGGTAATCT | AGCTGTATCG  |
| 4   | 1080600..1080864 | 2.01E-04     | AATCGCCCAC | ATGTAACCCAAGGTTACAT | TTATGACAAC  |
| 5   | 1103397..1103769 | 4.11E-06     | AGCCAATCAG | CGTTCACACAACGTGACCG | TTTTTCGCGT  |
| 6   | 1163827..1164099 | 8.38E-05     | TCCCAAGGCG | AGCCTACTGTGCGTAAGCT | GCCGCGGTTC  |
| 7   | 1219329..1219588 | 2.18E-05     | ATCACGAGAC | CCATTACGCACCGTTGCTG | TGCATGCAGA  |
| 8   | 1230947..1231216 | 4.11E-06     | CTGGCAAGGG | TGGTCACCTAGAGTCACCC | CCGTGCTGAT  |
| 9   | 1254784..1255042 | 1.35E-05     | TACGTCCGAA | AAATTACGCCGGGTCACCG | ATAATTTAC   |
| 10  | 1264060..1264323 | 2.73E-05     | GTAACCCAGA | CCGTGACCGAACGTGAAGA | GTGGGCGTTC  |
| 11  | 1264585..1264847 | 2.44E-05     | GCCCGGAGGG | CGGTGACCGAGCGTGGTGG | CTACCGAGTG  |
| 12  | 1295021..1295279 | 1.21E-04     | CACGGCGTTG | CTGTCACGTTGCGTGTGGT | GTCGGAACGT  |
| 13  | 143434..143700   | 8.14E-06     | CACTTTCTCG | CGGTGACGGTGAGTCAGCA | AGTGAGGCAT  |
| 14  | 1488864..1489140 | 7.62E-05     | CCGGCTGTTA | CAGCCACCGACCGTCACAG | CCCGAGGTCC  |
| 15  | 1511424..1511681 | 5.44E-06     | TGGATTCAA  | TGACTACTCAGCGTTACGG | CAGGGCGAGC  |
| 16  | 1533642..1533944 | 9.27E-06     | TGATGGTGAA | AAAACACGTTGCGTGATCA | TGACTAGGAT  |
| 17  | 1552477..1552749 | 2.97E-04     | TGTAAACCTC | CCATCGCCTTCTGTGATTG | TCGCCCTCGC  |
| 18  | 1573538..1573817 | 4.59E-04     | TCATGATCTA | AGACTACGCGCAGTGCCCG | TCCGAACGCA  |
| 19  | 1626957..1627220 | 6.93E-07     | ACATGTGTGC | CAATTACTGTGAGTGACAT | TTTCGGCCCT  |
| 20  | 1649128..1649396 | 7.62E-05     | TTGTCGGGGC | TCCTCACCTTCCGTATCCT | TGCCACCCTC  |
| 21  | 1654530..1654837 | 2.55E-04     | ACGACATCTC | CGGTAACGGTGCGTACACG | CACATGACCA  |
| 22  | 1751762..1752032 | 6.92E-05     | TGATCACTTC | CGACTACTGTCCGTCACTC | TTTGGAATTGA |
| 23  | 1808521..1808804 | 4.19E-05     | CGTCAATCAT | CAGCGACGGCGAGTGACCG | CCTCCGGCTC  |
| 24  | 1821745..1822005 | 1.01E-04     | TGACGACGTC | ATCATAAGCTGTGTAACCG | GCGAAGAGCT  |
| 25  | 1823811..1824068 | 2.44E-05     | CCTGGAGTCC | CGCACACTCACCGTGATCG | GCTTGCCGGA  |
| 26  | 1861159..1861414 | 4.65E-05     | CGCGGTGCA  | ATCTGACTCTCCGTACAG  | TCCGCTCTTC  |
| 27  | 1950647..1950915 | 1.64E-06     | GAACGCAGGT | TGATCACTCTCCGTGAAGT | CCTTGGTCAC  |
| 28  | 1984962..1985249 | 1.44E-04     | CCGTGGGCAA | CGAGCACGGAGAGTGGTCG | TTCGGGCGTA  |
| 29  | 2080681..2080944 | 2.55E-04     | GCGATGTCGA | CGCTGACCAAACGTCACAA | ATAGTCGAAG  |
| 30  | 2211577..2211849 | 6.92E-05     | TCACCCCGCA | TATCTACGCAGTGTTACTG | GCGGATGGTG  |
| 31  | 222486..222754   | 4.73E-06     | CGAGAGACGC | CGGTTACGCGCAGTCACCT | CGAGCACCTG  |
| 32  | 223057..223315   | 9.90E-07     | GAGCGGCCGG | TGGTCACGCTGAGTGTCCG | CTTGCTCGAT  |
| 33  | 226586..226880   | 6.92E-05     | GTCGGTGAAC | GCGTCACCCGCCGTGAACA | CGAAGATCAG  |
| 34  | 2328090..2328352 | 4.65E-05     | GCGCTTGAAT | CCGACACTCGCTGTGACGA | ATCGCTCACC  |
| 35  | 2343362..2343627 | 1.32E-04     | GACGTTCCGC | CAGGCACGGAGAGTAGTCG | TTAGGCACTG  |
| 36  | 2419036..2419310 | 5.76E-07     | GGCCTTCACC | ACGTCACCCTCAGTGACTT | CAAATTCAAA  |
| 37  | 245598..245861   | 9.90E-07     | ACCCGCCCCC | AGGTCACCCTCCGTAATGT | CTCTAGATCA  |
| 38  | 250302..250609   | 5.69E-05     | CCCGGCCATT | CGATCACGGGGCGTTAACG | GTCATCAAGC  |
| 39  | 2548123..2548393 | 1.57E-04     | AGGAGTGCCA | GAACTACGCGGAGTCACTG | CGTCGGAATC  |
| 40  | 2584878..2585176 | 5.31E-08     | CTCGTAGGGG | TAGTCACTCTCGGTGACCG | CCTGCTGGAA  |
| 41  | 2594..2851       | 2.44E-05     | TCGATGTGGA | CAGACACTGTGCGTCACAA | ACTTGTCCAC  |
| 42  | 2795138..2795408 | 7.62E-05     | CATCCAGCGC | ATGTCACGCCACGTGGCGG | GGTCACGCAG  |

|    |                  |          |             |                      |            |
|----|------------------|----------|-------------|----------------------|------------|
| 43 | 3020327..3020590 | 2.18E-05 | ACCGGACTCA  | CGGTAACAGCGCGTGACGG  | AGAAGGGCGG |
| 44 | 3029050..3029322 | 1.20E-05 | TCCGCCCCGA  | TGCTCACACAGAGTGGTCG  | TGGTGCGAGG |
| 45 | 3082315..3082574 | 2.44E-05 | TTGCTGTGAC  | AACTAACTTAGAGTGATAA  | CTTACTCGCG |
| 46 | 3112623..3112892 | 7.62E-05 | CGATCATCGA  | TGGTTACGGGCTGTGGCAG  | GTCGGGGTGC |
| 47 | 330581..330840   | 8.38E-05 | AGAGCCTCGT  | TGGTGACGCGCTGTGAAAA  | CGGTCAGACG |
| 48 | 3367509..3367784 | 6.87E-08 | CGAAGAGAAA  | CCGTCACTGAGAGTGACGG  | CTGTCCAGAG |
| 49 | 354391..354667   | 3.04E-05 | GTCAGCCGTT  | TGATTACATTTCGGTCACCC | TTATGGCGAT |
| 50 | 3559661..3559937 | 4.78E-07 | CCGCAGGTTT  | TGGTGACTCACGGTGACTG  | CGCGCGGTGC |
| 51 | 356374..356630   | 2.18E-05 | TACATCATGG  | TGGTCACCGGGCGTGTGCA  | GAAGGGTCTG |
| 52 | 3597235..3597545 | 3.77E-05 | TGGCAGTTCC  | ACGCCACTCACCGTATCGA  | CGGCCGTAC  |
| 53 | 3772454..3772710 | 1.39E-06 | GGTGACGGTT  | AGGTTACGCTGGGTGAATA  | GCTAGGGGGC |
| 54 | 3786423..3786700 | 3.94E-07 | AGGACGGTTG  | CCGTTACGCTCGGTGACCT  | GCGACTTGCG |
| 55 | 3798364..3798628 | 3.04E-05 | CCACCCCAT   | CCGTCACGTAGAGTCGCAG  | ACCGTCCGGG |
| 56 | 3830196..3830461 | 1.87E-03 | GTGGGGTAAC  | CGCTCACTGCGCGGGGGG   | GTCACCGTCG |
| 57 | 3841135..3841418 | 4.28E-04 | ACCGGCGGCG  | TGGACACCGACGGTGAGAC  | CGACGGCGAC |
| 58 | 3989836..3990099 | 9.27E-06 | ATGTGACCAG  | AGGTGACGTAGTGTACGA   | GGTGCATGTC |
| 59 | 4054167..4054424 | 1.35E-05 | TGTCAGCCGT  | TCACTACTGTGCGTAGCTA  | TCGACGGAAC |
| 60 | 4140468..4140739 | 3.55E-06 | TCGAGCGCGA  | TGCTCACGCCAGTGACGA   | CAGCGCGGTG |
| 61 | 4141065..4141324 | 3.55E-06 | ATGCAACGGC  | TCGTCACCGATGGTGACCG  | CGGTGGTGCC |
| 62 | 41573..41887     | 2.01E-04 | CCATCGAAGA  | ATGTTGCGGAACGTCACCA  | TCGCCGATCG |
| 63 | 424760..425029   | 1.35E-05 | TGTTACCAGG  | CAGCGACTTTCCGTAATCA  | AATCACCTCG |
| 64 | 4265782..4266047 | 1.21E-04 | CGCCAGGTGA  | TCGACACGAGCCGTAACGG  | CGGCGCGAGC |
| 65 | 4266294..4266554 | 1.10E-04 | ACCGGCTCCA  | CCGTCACCGTCCGCAACGT  | CTCCTGGAAC |
| 66 | 4296677..4296939 | 1.20E-05 | GTTTCGACACA | TCGTTACGCCTGGTGATCG  | TGGTCGTGTT |
| 67 | 4359905..4360166 | 4.73E-06 | GATTCGAGCT  | CGGTCACACAACGTAGTCA  | GCTCGGCCAA |
| 68 | 4369604..4369922 | 9.27E-06 | CGTGACGATC  | TCGTTACAGAGAGTCGCGA  | TGCCGGTGGT |
| 69 | 4379197..4379546 | 2.26E-06 | GAGCCCCGCC  | CGCTCACCGTGAGTGACCT  | CTCCCCTCGC |
| 70 | 4410559..4410844 | 1.72E-05 | ACCGGAACAC  | ACGTAACGCATGGTGACGG  | GCTTGGCAGG |
| 71 | 4676647..4676910 | 6.24E-06 | GCGCCCCATG  | AGGTCACTGCCAGTGACAG  | GAGGTGGTTC |
| 72 | 4825530..4825845 | 4.59E-04 | CAGCCGAGAA  | TACATACGCTCAGTGTGCG  | ATTGACTACA |
| 73 | 4906934..4907191 | 4.78E-07 | GTCGGAGCCG  | AGGTCACGCAGCGTGGCCA  | TCCGCCGCTC |
| 74 | 4959030..4959286 | 7.62E-05 | CATCCCCGTC  | AAACCACCCTAAGTAGTGA  | ATTAGTTACG |
| 75 | 5025249..5025506 | 4.78E-07 | CGCCCCTCCC  | TGCTCACCCCTGCGTGACGA | CGCCCCGGAG |
| 76 | 5083238..5083493 | 1.94E-05 | GCCACATCGA  | CCCCCACCAGCGTGATCA   | GGCTCTCAGC |
| 77 | 5085477..5085740 | 2.44E-05 | TTTCCATTAA  | CCATTACACCTAGTAACCT  | TCGACAGACT |
| 78 | 5114683..5115065 | 4.11E-06 | CCC GCGC    | TGTTACCTTGAGTAATGT   | GGTGACGAAT |
| 79 | 5117418..5117685 | 3.55E-06 | CCGGTAACCC  | AGGTCACGCAGCGTCGCTA  | AATCGCAGGT |
| 80 | 5141027..5141303 | 1.39E-06 | GACGGCGTTC  | CGATCACGCTACGTACCT   | GGCAACGCAC |
| 81 | 5144261..5144522 | 6.24E-06 | GCCCATCTCG  | TCGTGACGGCGCGTGACGG  | TCCCGCCGAG |
| 82 | 5214684..5214944 | 2.97E-04 | GGCTCCGTAA  | CACTCACTGTGAGCGACGC  | CTCCCACGGT |
| 83 | 5229521..5229790 | 1.72E-05 | GGCGTGGCGG  | GGATCACCCAGCGTCATGT  | TGATCTCGGT |
| 84 | 5300865..5301132 | 8.14E-06 | CGCACCATTC  | CCCTTACGCAGCGTGCTA   | AAATGGCCAC |
| 85 | 5385915..5386182 | 4.73E-06 | AGCCTAGCGA  | CCGTCACGGAAGTATCCA   | ACCAACCGAT |
| 86 | 5403424..5403790 | 5.15E-05 | ACCGAGTCGG  | CAACCACTCTGCGTAGGCA  | AACGTGAGGA |
| 87 | 5419768..5420148 | 8.30E-07 | TACTGCCAAA  | CAATCACTTTGTGTGACTG  | GCGGCTCATT |

|     |                  |          |            |                      |             |
|-----|------------------|----------|------------|----------------------|-------------|
| 88  | 5635826..5636087 | 4.78E-07 | GGGGGCCTTC | TCGTCACTCTGCGTGTCCA  | CATAGGATTA  |
| 89  | 5732393..5732648 | 3.77E-05 | GTGGGCTCCG | CCGTCACCGGTGGTAACCG  | TTGTGCCGGG  |
| 90  | 577183..577565   | 3.94E-07 | GAGAACTGTC | CGGTCACTGTGCGTGATCG  | GAGCGTCCGA  |
| 91  | 5954432..5954693 | 1.74E-07 | AAATCGTCAA | CAATCACACAGAGTGACCG  | GGTGCGGATC  |
| 92  | 6194511..6194783 | 1.20E-05 | CAGCGCCACC | GCCTTACCCAGCGTGACCG  | TCACCGCGTC  |
| 93  | 6198514..6198774 | 1.93E-06 | ACGGTGCTGA | CAGTCACTGAGCGTAGCTG  | AGACGGAAAT  |
| 94  | 6233515..6233773 | 1.10E-04 | TCACCGCCCT | TGATCACTCTGCGTTGATC  | GACATATCAC  |
| 95  | 6687333..6687592 | 9.90E-07 | AAACTCCGTA | CCGTCACGCAGCGTAGCGA  | TCCGCGAGGA  |
| 96  | 670006..670313   | 4.73E-06 | GAACACGACA | TCGTCAACCGTGCCTGAGAA | GTCGAAGGAA  |
| 97  | 6834433..6834691 | 4.73E-06 | ATCACTCAAG | CAGTGACGCTAAGTAATAG  | TTTTCTGCTC  |
| 98  | 688524..688843   | 1.35E-05 | ACTATGGCAG | GCGTCACTGTGGGTACTG   | GAGGGCGACG  |
| 99  | 6892302..6892566 | 1.94E-05 | TAACCGTCCG | GCGTCACCCTCCGTAAGCG  | TGGTGATCCC  |
| 100 | 6979498..6979789 | 6.43E-04 | TTTCTCACCT | CGGTGACTTACTGTGCGGT  | AACCGAAGCG  |
| 101 | 7081702..7081962 | 9.20E-05 | CCACGCCCCG | GCCTCACCGAGAGTGGCCG  | CCGCGTCGAA  |
| 102 | 719203..719467   | 1.10E-04 | TCTGTAAACG | CATCAACGCAGCGTCACCG  | TGTGTGTATC  |
| 103 | 7323797..7324058 | 8.83E-08 | ATGCGTCGAG | AAGTCACTCTGCGTGACGT  | CGCGGAGCTG  |
| 104 | 7358708..7358980 | 1.53E-05 | CACCGGTCCG | AGATCACCCCTCCGTATTGA | TCTACGACGA  |
| 105 | 7365300..7365596 | 3.24E-07 | GCGGTCCGGC | AGGTCACGCTGGGTACCA   | CGACGTCGTC  |
| 106 | 7367211..7367488 | 1.94E-05 | GGTGTGACGA | CCGTGACTCGCTGTGATCG  | TTCTAACCCG  |
| 107 | 740983..741245   | 2.36E-04 | CCCTGAGCTG | CGGTTACTCACCGCTATCC  | CACTGTCTGTG |
| 108 | 7429846..7430122 | 8.28E-04 | ACCACCCGTA | CATCAACGGGTGGTGATCA  | GACCGTTGTG  |
| 109 | 7484144..7484488 | 1.05E-05 | CCGGAAACGA | CCGTCACCCCATGTGATCA  | GGATGCCGGA  |
| 110 | 749647..749977   | 3.45E-04 | AGATGAGCAA | CCGCTACGAGCTGTCACGA  | TGGGCCGCTG  |
| 111 | 751801..752062   | 6.24E-06 | GCGGAACGGC | CCATCACTGAGAGTCAGCG  | CCTCGCGCTG  |
| 112 | 7526992..7527364 | 2.73E-05 | CGCATTTACA | TAGTCACAGAGAGCAACCG  | CAACCGGCC   |
| 113 | 7652398..7652677 | 1.32E-04 | GCCTTCGCCA | TCGTGACTCCTTGTGACGC  | GCTGCGTCTC  |
| 114 | 7674971..7675236 | 1.85E-04 | GGTCATGGCA | CCAGCACTCCACGTGATCG  | CCGGGCCTGG  |
| 115 | 7791515..7791776 | 7.62E-05 | ACGAGGTGAA | CAGTGACCACACGTGACCG  | GCAGCCCCTG  |
| 116 | 7844864..7845123 | 9.27E-06 | ATCTCTGTGT | AAATAACTGACAGTAAGCA  | AGAGTGCAAC  |
| 117 | 7852533..7852823 | 1.10E-04 | GCTGGTCTGC | AAGTTACGCCACGTAGGCG  | CGGAACGCCA  |
| 118 | 7866639..7866923 | 1.53E-05 | AGCGGGTTGA | CCGCTACTGAACGTACCGA  | ACACCGTGTG  |
| 119 | 7869344..7869599 | 4.78E-07 | TTGCTGAGCG | TAGTCACGTACGGTGACCT  | GGGGAAATCA  |
| 120 | 7872507..7872783 | 8.14E-06 | CCCACCACGA | CCACGACGCAGCGTGACGA  | CCGCCTGCCG  |
| 121 | 7886041..7886302 | 5.15E-05 | CCCCCGGGTC | ACGTCACCCGCCGTAGCGG  | GAAAGCTCTG  |
| 122 | 7906935..7907204 | 8.14E-06 | CGCGGACCAC | CGGTAACCCAGAGTGAAC   | AATCCGTTTA  |
| 123 | 7911162..7911418 | 6.28E-05 | CACTTGACAT | TGGCCACTCGGGGTAGTGA  | CACAGGCACC  |
| 124 | 7935382..7935650 | 6.24E-06 | CCGGCCTGTT | CGGTAACCGAAAGTAATGG  | CCGGATCTGC  |
| 125 | 8016907..8017210 | 9.90E-07 | ACCGCCGCTA | CGATCACCCCTGGGTGATGG | CGAGGTTTTG  |
| 126 | 8076494..8076763 | 2.65E-07 | AACCCGATTT | CAGTCACGCTGTGTAACCG  | GTGGGTAAAG  |
| 127 | 8080825..8081114 | 1.12E-07 | CGTAATGCTG | TGATTACTCAGCGTCATTA  | CCGGCAGCTT  |
| 128 | 8167186..8167456 | 3.20E-04 | AAGCCGATTG | TCATCACCGCAGGTACAC   | CCGAGAGGGT  |
| 129 | 8168913..8169278 | 5.69E-05 | CGACACCATC | CGCCTACTTTCAGTTACGA  | TAGGTTGCC   |
| 130 | 8186072..8186327 | 6.28E-05 | GTCGTCAAGG | CGGTACGGCGCGTAGCTC   | CGATGAGGAG  |
| 131 | 8197191..8197509 | 1.53E-05 | GATGAAAAAT | GAGTCACCCTCCGTAAGGA  | GCTCGACACC  |
| 132 | 8232310..8232594 | 1.18E-03 | CGTACGGAGA | CGAGCACTGGTCGTGTTCA  | GTTTTACTCA  |

---

|     |                  |          |            |                      |            |
|-----|------------------|----------|------------|----------------------|------------|
| 133 | 8302647..8302992 | 2.26E-06 | CACCCCGCGC | CCGTTACCCGGGGTGACCA  | CAGTCCCCGC |
| 134 | 8333790..8334050 | 1.53E-05 | GATGATCTGC | TGCTCACGCTCGGTGAGGG  | CCGGTCTTTC |
| 135 | 8362838..8363113 | 3.04E-05 | CGCTCGTCGT | CAATTACAGAGAGTGGCC   | CAGGATGCGG |
| 136 | 8378052..8378318 | 2.16E-07 | GAAGCTGCCT | TAGTAACTCAAAGTGATCA  | GCACGTCACG |
| 137 | 8386105..8386366 | 3.24E-07 | CCACGTCGCC | AAGTGACGCAGCGTGACGA  | ATCATCACGC |
| 138 | 8387412..8387672 | 6.28E-05 | GCTGACCCTC | GGGTGACTCTGTGTAGTGG  | GGTGGCCGAT |
| 139 | 8406748..8407032 | 8.38E-05 | CGTCATACTC | CGGCTGCGGAGCGTAACCA  | GGCTCGGGCG |
| 140 | 8411862..8412157 | 8.14E-06 | TTCACGCGCT | CCTTCACCTTGGGTAAACGA | AACGGGCGCT |
| 141 | 8447425..8447705 | 1.01E-04 | GACCGCTGAA | TTGTCACTAGCGGTACCGG  | CATTTCTGGT |
| 142 | 8452173..8452447 | 8.14E-06 | GACGCTTCCT | AAGTGACTATAAGTGACCT  | CTTGGGCATC |
| 143 | 8458114..8458496 | 2.65E-07 | ATGTCCGTTT | CGGTCACCTTGGGTGACCA  | AAAGGGGCGG |
| 144 | 8462486..8462752 | 5.69E-05 | CGTAGTTGGG | TGATTACGCAACGTTGTCC  | CTCAAATACG |
| 145 | 8496037..8496293 | 5.44E-06 | ATGCCCGTCA | AGGCCACGCAGCGTAACAG  | ATCGGCCAAG |
| 146 | 8505092..8505357 | 1.35E-05 | TGTACACGCA | TGACTACGCTGCGTGAATT  | GTTAGCCCAG |
| 147 | 8512657..8512941 | 9.27E-06 | CGCGGCCCTT | GAGTCACGCTCCGTAGCTA  | CTTAATGTCC |
| 148 | 8520462..8520749 | 2.55E-04 | GGTGCGGGCA | TCGTCACATATAGCGATTT  | GTCCGTTTAC |
| 149 | 8523931..8524195 | 1.39E-06 | TCACCCAAAG | ATGTCACCCTGAGTGACAA  | CCATCCGGTG |
| 150 | 8528804..8529066 | 7.62E-05 | AGGCGACACT | TCGTTACAAGGCGTAGCCG  | GCTGCCACGA |
| 151 | 8642381..8642649 | 6.28E-05 | CAAGAGCGCA | ACGCTACGTAAAGTAATTC  | TCGCCGAGGG |
| 152 | 8656812..8657068 | 1.53E-05 | TACCGCGAAC | TGATTACCGTCGGTCAGCA  | CCTGGCCGAC |
| 153 | 8666142..8666430 | 8.38E-05 | GATCCAAAGG | TCGTGGCGGTGCGTAATCT  | TTTTCCGGAT |
| 154 | 8686973..8687341 | 4.59E-04 | CGTAGGCACA | CGAGCACGTACGGTAGTTG  | GAAAAGAGAG |
| 155 | 8725272..8725534 | 2.21E-08 | GACGTGCTTT | TGATCACTCACGGTGACCA  | CCAAATGGAG |
| 156 | 873292..873554   | 3.39E-05 | TGAATCCGTT | TGCCTACGCTGAGTAATTC  | CGGCGTGGTA |
| 157 | 918289..918544   | 1.39E-06 | AAGGAAGCGC | TCTTCACTCTCGGTGACCG  | TCCCAGGGCG |
| 158 | 939736..940004   | 4.28E-04 | CAACTGCGGA | AACTACTCCCAGTATTTG   | ACTCCCATGC |
| 159 | 949656..949915   | 1.01E-04 | CTTGCGGATT | TCGTTACACCGGTAGACT   | CCAGTCCCCT |
| 160 | 98496..98761     | 2.36E-04 | AGGCCGCCGT | TCACCACCTGTAGTCACTA  | AGTTATTACC |
| 161 | 985912..986185   | 6.24E-06 | TAGTGAGGTG | TTGTCACGCTGCGTGTTTCG | GGCTGAGAAG |
| 162 | 986411..986710   | 1.94E-05 | AGCCGTCATT | TGATCACGCTCGGTGAAGC  | GATGTTTGCC |
| 163 | 993227..993507   | 1.72E-05 | CCAACACTTG | TAGTAACTGTCTGTCATGG  | AGTTCTCGGC |

---

**Table S4.** BldD box-containing AmBldD-binding sites that were detected by a ChIP-seq analysis with a loosened threshold (p-value < 0.05).

| No. | Region           | MEMEp-value | Upstream   | BldD box             | Downstream |
|-----|------------------|-------------|------------|----------------------|------------|
| 1   | 8725272..8725534 | 1.11E-08    | GACGTGCTTT | TGATCACTCACGGTGACCA  | CCAAATGGAG |
| 2   | 3367509..3367784 | 2.53E-08    | CGAAGAGAAA | CCGTCACTGAGAGTGACGG  | CTGTCCAGAG |
| 3   | 2584878..2585176 | 8.85E-08    | CTCGTAGGGG | TAGTCACTCTCGGTGACCG  | CCTGCTGGAA |
| 4   | 577183..577565   | 1.16E-07    | GAGAACTGTC | CGGTCACTGTTCGGTGATCG | GAGCGTCCGA |
| 5   | 7323797..7324058 | 1.50E-07    | ATGCGTCGAG | AAGTCACTCTGCGTGACGT  | CGCGGAGCTG |
| 6   | 8016907..8017210 | 1.94E-07    | ACCGCCGCTA | CGATCACCCCTGGGTGATGG | CGAGGTTTTG |
| 7   | 7804026..7804286 | 1.94E-07    | CGGAGCACCG | GGGTCACTCAGCGTGACGG  | CCAGGGTGGA |
| 8   | 5025249..5025506 | 2.48E-07    | CGCCCCTCCC | TGCTCACCCCTGCGTGACGA | CGCCC GGAG |
| 9   | 3786423..3786700 | 2.48E-07    | AGGACGGTTG | CCGTTACGCTCGGTGACCT  | GCGACTTGCG |
| 10  | 8458114..8458496 | 3.16E-07    | ATGTCCGTTT | CGGTCACTTGGGTGACCA   | AAAGGGGCGG |
| 11  | 5954432..5954693 | 3.16E-07    | AAATCGTCAA | CAATCACACAGAGTGACCG  | GGTGCGGATC |
| 12  | 8080825..8081114 | 3.99E-07    | CGTAATGCTG | TGATTACTCAGCGTCATTA  | CCGGCAGCTT |
| 13  | 7365300..7365596 | 3.99E-07    | GCGGTCCGGC | AGGTACGCTGGGTACCA    | CGACGTCGTC |
| 14  | 5635826..5636087 | 3.99E-07    | GGGGCCTTC  | TCGTCACTCTGCGTGCCA   | CATAGGATTA |
| 15  | 8386105..8386366 | 5.01E-07    | CCACGTCGCC | AAGTGACGCAGCGTGACGA  | ATCATCACGC |
| 16  | 2909863..2910124 | 5.01E-07    | GCGTCACCCG | TGATCACGGTCTGTGACTG  | GCGGATGGTG |
| 17  | 8076494..8076763 | 6.24E-07    | AACCCGATTT | CAGTCACGCTGTGTAACGG  | GTGGGTAAAG |
| 18  | 6538086..6538438 | 6.24E-07    | CGCCGACTGA | TAGTCAACGTCGGTGATGG  | AGGAGCCAG  |
| 19  | 2419036..2419310 | 6.24E-07    | GGCCTTCACC | ACGTCAACCTCAGTGACTT  | CAAAATCAA  |
| 20  | 245598..245861   | 6.24E-07    | ACCCGCCCCC | AGGTCAACCTCCGTAATGT  | CTCTAGATCA |
| 21  | 5753852..5754149 | 7.70E-07    | CGAATACAAG | TGATCACTGTGCGTAAACG  | CGGACGATAT |
| 22  | 4906934..4907191 | 7.70E-07    | GTCGGAGCCG | AGGTACGCAGCGTGCCCA   | TCCGCCGCTC |
| 23  | 1950647..1950915 | 7.70E-07    | GAACGCAGGT | TGATCACTCTCCGTGAAGT  | CCTTGGTAC  |
| 24  | 223057..223315   | 7.70E-07    | GAGCGGCCGG | TGGTACGCTGAGTGTCGG   | CTTGCTCGAT |
| 25  | 7905201..7905495 | 9.45E-07    | GTCGACCTGG | TCGTACGCTGGGTGGCGA   | CGGCACGGTG |
| 26  | 7869344..7869599 | 9.45E-07    | TTGCTGAGCG | TAGTCACGTACGGTGACCT  | GGGAAATCA  |
| 27  | 5493115..5493377 | 9.45E-07    | CGCCGCCCGA | CCGTCAACGACCGTGAGCA  | CCTGGTGCC  |
| 28  | 3559661..3559937 | 9.45E-07    | CCGCAGGTTT | TGGTGA CTACGGTGACTG  | CGCGCGGTGC |
| 29  | 918289..918544   | 9.45E-07    | AAGGAAGCGC | TCTTCACTCTCGGTGACCG  | TCCCGAGGCG |
| 30  | 911817..912103   | 9.45E-07    | CACGATAGAG | GGATCACTGTGAGTGACGT  | CATCGGAACG |
| 31  | 8378052..8378318 | 1.15E-06    | GAAGCTGCCT | TAGTAACTCAAAGTGATCA  | GCACGTCACG |
| 32  | 7012699..7012988 | 1.15E-06    | CTCGTGAAC  | CGGTCAACGAGCGTCACGT  | ACAGATCCAG |
| 33  | 6846686..6846957 | 1.15E-06    | ACGGTCCGGG | CCATCACTGGGGTGACGA   | GACCGTACCG |
| 34  | 6687333..6687592 | 1.15E-06    | AAACTCCGTA | CCGTACGCAGCGTAGCGA   | TCCGCGAGGA |
| 35  | 4284980..4285270 | 1.15E-06    | GTGGTCCGCA | ACGCCACGCTGCGTGACGA  | CGAGCTGATG |
| 36  | 4141065..4141324 | 1.15E-06    | ATGCAACGGC | TCGTCAACGATGGTGACCG  | CGGTGGTGCC |
| 37  | 4379197..4379546 | 1.40E-06    | GAGCCCGCCC | CGCTCAACGTCAGTGACCT  | CTCCCTCGC  |
| 38  | 5141027..5141303 | 1.69E-06    | GACGGCGTTC | CGATCACGCTACGTACCT   | GGCAACGCAC |
| 39  | 1626957..1627220 | 1.69E-06    | ACATGTGTGC | CAATTACTGTGAGTGACAT  | TTTCGGCCCT |
| 40  | 576356..576730   | 1.69E-06    | GCCACTACGC | CCATCACGCACGGTGAGTA  | GGGCATGTCT |
| 41  | 8523931..8524195 | 2.04E-06    | TCACCCAAAG | ATGTCAACCTGAGTGACAA  | CCATCCGGTG |

|    |                  |          |             |                             |             |
|----|------------------|----------|-------------|-----------------------------|-------------|
| 42 | 8302647..8302992 | 2.04E-06 | CACCCCGCGC  | CCGTTACCCGGGGTGACCA         | CAGTCCCCGC  |
| 43 | 7758653..7758910 | 2.04E-06 | GGGTGGGGGT  | CCATCACGTAGCGTCATGG         | TCACAGGTGG  |
| 44 | 6775588..6775882 | 2.04E-06 | GGATCGTATT  | GCATCACTGAGCGTCATCA         | AAGAGCTTCG  |
| 45 | 4516206..4516489 | 2.44E-06 | AGCGCCTCGG  | TCATCACGGAGCGTAGCGG         | GATGTGCTTG  |
| 46 | 4448179..4448464 | 2.44E-06 | CCCGTCACAC  | CGGTCACCGTGCGTGCCG          | GGTAGCGGTG  |
| 47 | 4140468..4140739 | 2.44E-06 | TCGAGCGCGA  | TGCTCACGCCAGTGACGA          | CAGCGCGGTG  |
| 48 | 3176481..3176763 | 2.44E-06 | CGGAGCGGGA  | TGGTGA CTCACAGTGAGGG        | GGAGGGAGCG  |
| 49 | 2672017..2672390 | 2.44E-06 | TAGGGCGATC  | CCGTCACCGACGGTCACCG         | ACAGATCAGA  |
| 50 | 670006..670313   | 2.44E-06 | GAACACGACA  | TCGTACCGTGCGTGAGAA          | GTCGAAGGAA  |
| 51 | 3772454..3772710 | 2.91E-06 | GGTGACGGTT  | AGGTTACGCTGGGTGAATA         | GCTAGGGGGC  |
| 52 | 446247..446522   | 2.91E-06 | ACCCAGCGGA  | TGGTCACCTACGGTCACGA         | CGACGCGATC  |
| 53 | 8743341..8743630 | 3.46E-06 | CCGGCGACCG  | CCATCACACAGCGTGCCGA         | CACAAC'TGCG |
| 54 | 8324886..8325174 | 3.46E-06 | GGCAGAGATG  | CGGTTACTGAGCGTCATCC         | TCGGTTCATC  |
| 55 | 5419768..5420148 | 3.46E-06 | TACTGCCAAA  | CAATCACTTTGTGTGACTG         | GCGGCTCATT  |
| 56 | 5144261..5144522 | 3.46E-06 | GCCCATCTCG  | TCGTGACGGCGCGTGACGG         | TCCC GCCGAG |
| 57 | 4187437..4187700 | 3.46E-06 | GCGGGGTAA   | CGGTTACCAACTGTGACGA         | ACCTCCTTCG  |
| 58 | 1047431..1047732 | 3.46E-06 | GGGGCCTTTT  | TCGTTACTGCCTGTGATCA         | GGGGGCCGTG  |
| 59 | 8319506..8319774 | 4.10E-06 | GCGGTCATCA  | CCATCACGGTACGTAATGC         | CGCGCCCGTG  |
| 60 | 7606839..7607214 | 4.10E-06 | CGCCCGGCGC  | ACGTCACCGCGGGTGATGA         | CCTCGATCCG  |
| 61 | 6627585..6627866 | 4.10E-06 | CGAAGTCTAA  | CTATCACCGTGAGTGAGGA         | TGGGAGGAGT  |
| 62 | 5993575..5993847 | 4.10E-06 | GAGACCCGCT  | GGGTCACGATGCGTGACAA         | GCCGCCGGCG  |
| 63 | 2500909..2501247 | 4.10E-06 |             | TA CCGTCACTTATCGTAATGT      | CGGCAGCGCA  |
| 64 | 985912..986185   | 4.10E-06 | TAGTGAGGTG  | TTGTCACGCTGCGTGTTTCG        | GGCTGAGAAG  |
| 65 | 751801..752062   | 4.10E-06 | GGCGAACGGC  | CCATCACTGAGAGTCAGCG         | CCTCGCGCTG  |
| 66 | 7872507..7872783 | 4.83E-06 | CCCACCACGA  | CCACGACGCAGCGTGACGA         | CCGCCTGCCG  |
| 67 | 6764873..6765128 | 4.83E-06 |             | CAG TAGTCACCCTCGGTGGCGA     | GGTAGTAGGC  |
| 68 | 986411..986710   | 5.68E-06 | AGCCGTCAAT  | TGATCACGCTCGGTGAAGC         | GATGTTTGCC  |
| 69 | 8333790..8334050 | 6.67E-06 | GATGATCTGC  | TGCTCACGCTCGGTGAGGG         | CCGGTCTTTC  |
| 70 | 7549682..7549956 | 6.67E-06 | GGCCCCGGCG  | CGACCACGCTGCGTCATCG         | GGCTCGACCT  |
| 71 | 5385915..5386182 | 6.67E-06 | AGCCTAGCGA  | CCGTCACGGAAAGTATCCA         | ACCAACCGAT  |
| 72 | 5229521..5229790 | 6.67E-06 | GGCGTGCGCG  | GGATCACCCAGCGTCATGT         | TGATCTCGGT  |
| 73 | 4676647..4676910 | 6.67E-06 | GCGCCCCATG  | AGGTCACTGCCAGTGACAG         | GAGGTGGTTC  |
| 74 | 4658870..4659133 | 6.67E-06 | ATCAATCAGG  | GCGTCACCATCGGTGACGA         | CGCGATCGTC  |
| 75 | 2562586..2562803 | 6.67E-06 | GACCCCTGCG  | CGCTCACTCCCCGTGACCT         | CACGTCGGCT  |
| 76 | 1230947..1231216 | 6.67E-06 | CTGGCAAGGG  | TGGTCACCTAGAGTCACCC         | CCGTGCTGAT  |
| 77 | 1103397..1103769 | 6.67E-06 | AGCCAATCAG  | CGTTCACACAACGTGACCG         | TTTTTCGCGT  |
| 78 | 7935382..7935650 | 7.80E-06 | CCGGCCTGTT  | CGGTAACCGAAAGTAATGG         | CCGGATCTGC  |
| 79 | 7906935..7907204 | 7.80E-06 | CGCGGACCAC  | CGGTAACCCAGAGTGA ACT        | AATCCGTTTA  |
| 80 | 7358708..7358980 | 7.80E-06 | CACCGGTCGG  | AGATCACCCCTCCGTATTGA        | TCTACGACGA  |
| 81 | 6198514..6198774 | 7.80E-06 | ACGGTGCTGA  | CAGTCACTGAGCGTAGCTG         | AGACGGAAAT  |
| 82 | 6194511..6194783 | 7.80E-06 | CAGCGCCACC  | GCCTTACCCAGCGTGACCG         | TCACCGCGTC  |
| 83 | 5178014..5178394 | 7.80E-06 | GCCAACCGTG  | CCGTCACGCTGCGCGACGT         | CGCCGGGCTC  |
| 84 | 5114683..5115065 | 7.80E-06 |             | CCC GCGC TGTTACCTTGAGTAATGT | GGTGACGAAT  |
| 85 | 4410559..4410844 | 7.80E-06 | ACCGGAACAC  | ACGTAACGCATGGTGACGG         | GCTTGGCAGG  |
| 86 | 4296677..4296939 | 7.80E-06 | GTTTCGACACA | TCGTTACGCCTGGTGATCG         | TGGTCGTGTT  |

---

|     |                  |          |             |                      |            |
|-----|------------------|----------|-------------|----------------------|------------|
| 87  | 222486..222754   | 7.80E-06 | CGAGAGACGC  | CGGTTACGCGCAGTCACCT  | CGAGCACCTG |
| 88  | 8411862..8412157 | 9.10E-06 | TTCACGCGCT  | CCTTCACCTTGGGTAACGA  | AACGGGCGCT |
| 89  | 5117418..5117685 | 9.10E-06 | CCGGTAACCC  | AGGTCACGCAGCGTCGCTA  | AATCGCAGGT |
| 90  | 4466596..4466870 | 9.10E-06 | CCGGCGGTTCG | CTGTTACGGGCCGTGATGG  | CCGGGGCGGG |
| 91  | 2545819..2546103 | 9.10E-06 | CCTGTCGTGT  | CCCTTACGGTCGGTCACCA  | GCTCGACACT |
| 92  | 1511424..1511681 | 9.10E-06 | TGGATTCAAA  | TGACTACTCAGCGTTACGG  | CAGGGCGAGC |
| 93  | 143434..143700   | 9.10E-06 | CACTTTCTCG  | CGGTGACGGTGAGTCAGCA  | AGTGAGGCAT |
| 94  | 8496037..8496293 | 1.06E-05 | ATGCCCGTCA  | AGGCCACGCAGCGTAACAG  | ATCGGCCAAG |
| 95  | 7903343..7903704 | 1.06E-05 | GCCGGGCTTG  | CCCTTACCCAGAGTGAGCG  | GCTAGAGTCT |
| 96  | 7484144..7484488 | 1.06E-05 | CCGGAACGA   | CCGTCACCCCATGTGATCA  | GGATGCCGGA |
| 97  | 6892302..6892566 | 1.06E-05 | TAACCGTCCG  | GCGTCACCCTCCGTAAGCG  | TGGTGATCCC |
| 98  | 5145804..5146059 | 1.06E-05 | CAGCCGCTCA  | CCATGACCATCGGTGACCG  | ACAACAGCCG |
| 99  | 5083238..5083493 | 1.06E-05 | GCCACATCGA  | CCCCACCCAGCGTGATCA   | GGCTCTCAGC |
| 100 | 1694759..1695044 | 1.06E-05 | ATTCCGCGGG  | TGGTTACCGAGCGTTAAGG  | TGAGCGGCTG |
| 101 | 1533642..1533944 | 1.06E-05 | TGATGGTGAA  | AAAACACGTTGCGTGATCA  | TGACTAGGAT |
| 102 | 1094153..1094431 | 1.06E-05 | AGCAACCATT  | ACGTCACCTTGGGTCACAA  | TGACCTCGGA |
| 103 | 1050581..1050963 | 1.06E-05 | TCCGGCCCCA  | CGGTGACGCATAGTCACCT  | CCATGCTCGC |
| 104 | 688524..688843   | 1.06E-05 | ACTATGGCAG  | GCGTCACTGTGGGTTACTG  | GAGGGCGAGC |
| 105 | 8656812..8657068 | 1.23E-05 | TACCGCGAAC  | TGATTACCGTCGGTCAGCA  | CCTGGCCGAC |
| 106 | 8448919..8449193 | 1.23E-05 | GCCTGACCAC  | TGGTGACGCTGCGTATCTG  | CCGGCGCTCG |
| 107 | 8441273..8441545 | 1.23E-05 | CGTGCTCACC  | TGATCACACGGCGTGAGGG  | AGCACGGCTC |
| 108 | 8197191..8197509 | 1.23E-05 | GATGAAAAT   | GAGTCACCCTCCGTAAGGA  | GCTCGACACC |
| 109 | 1823811..1824068 | 1.23E-05 | CCTGGAGTCC  | CGCACACTCACCGTGATCG  | GCTTGCCGGA |
| 110 | 1620466..1620734 | 1.23E-05 | TCCGGCATA   | CGGTCGCCGTGCGTGACGG  | TCCGGCGGTA |
| 111 | 1264060..1264323 | 1.23E-05 | GGACACAAGA  | GCCTCACCCCTCGGTGACCG | CTAGATCCCC |
| 112 | 1189129..1189397 | 1.23E-05 | CCAAATGGTC  | ACATAACTTTCGTCATGA   | CGGACGACGA |
| 113 | 1171194..1171534 | 1.23E-05 | AGTCACCGGG  | CCATCGCGGTGCGTAACCG  | CGTCGGCCGC |
| 114 | 600084..600367   | 1.23E-05 | CTTCGAGCAC  | GAGTCACTGAACGTGACCC  | TGGACGGTCC |
| 115 | 356374..356630   | 1.23E-05 | TACATCATGG  | TGGTCACCGGGCGTGTCGA  | GAAGGGTCTG |
| 116 | 6737418..6737713 | 1.42E-05 | TAGCAGGCAC  | TCGTCACCGTCAGTGGGGA  | CCGTGCGGCC |
| 117 | 5803324..5803581 | 1.42E-05 | GTCCCCGGG   | TGCCTACCGAGCGTGACGA  | GCGCCTGTTG |
| 118 | 5300865..5301132 | 1.42E-05 | CGCACCATTC  | CCCTTACGCAGCGTGCTA   | AAATGGCCAC |
| 119 | 4359905..4360166 | 1.42E-05 | GATTCGAGCT  | CGGTCACACAACGTAGTCA  | GCTCGGCCAA |
| 120 | 1633890..1634168 | 1.42E-05 | GATGTCACTG  | GGGTCACTCACAGTAGTGG  | GGCAGTACGC |
| 121 | 1009746..1010015 | 1.42E-05 | CAACGCCGAC  | GGGTCACTGGACGTAACGA  | GAGAATTCGT |
| 122 | 7844864..7845123 | 1.64E-05 | ATCTCTGTGT  | AAATAACTGACAGTAAGCA  | AGAGTGCAAC |
| 123 | 7595196..7595458 | 1.64E-05 | TCCGAGGCGA  | AGGTCACGCTCAGTAGTAG  | CCGCAGGGCC |
| 124 | 7367211..7367488 | 1.64E-05 | GGTGTGACGA  | CCGTGACTCGCTGTGATCG  | TTCTAACCCG |
| 125 | 6834433..6834691 | 1.64E-05 | ATCACTCAAG  | CAGTGACGCTAAGTAATAG  | TTTTCTGCTC |
| 126 | 6102043..6102317 | 1.64E-05 | CATCAGGTTCG | CGCTTACGGTCCGTGGTGA  | ACTGTGAGTA |
| 127 | 5853469..5853749 | 1.64E-05 | TTGTTCACTG  | ACGCCACTAAGCGTGACTG  | ATCAGTAACG |
| 128 | 5436060..5436427 | 1.64E-05 | CGCCACGAGG  | CCGACACGCCGCGTAACCG  | CGGACCGGCC |
| 129 | 3788149..3788413 | 1.64E-05 | GAGCCGGCCA  | GCGTCACAGGGCGTGACGG  | CTCGTTGTGG |
| 130 | 3020327..3020590 | 1.64E-05 | ACCGGACTCA  | CGGTAACAGCGCGTGACGG  | AGAAGGGCGG |
| 131 | 1264585..1264847 | 1.64E-05 | GCCCGGAGGG  | CGGTGACCGAGCGTGGTGG  | CTACCGAGTG |

---



|     |                  |          |            |                      |             |
|-----|------------------|----------|------------|----------------------|-------------|
| 132 | 1037253..1037515 | 1.64E-05 | CAAGTCCCGT | CGATCACCCCACGTGAGCA  | AAAGGCTCGG  |
| 133 | 7457186..7457457 | 1.88E-05 | TTCGTCGTAT | CGACGACGGAGAGTGACAA  | GTCGGGCCAC  |
| 134 | 4748968..4749274 | 1.88E-05 | TTGATCTGTG | TGGTGACCGAGGGTGTCCG  | TGACGTGCGA  |
| 135 | 3029050..3029322 | 1.88E-05 | TCCGCCCCGA | TGCTCACACAGAGTGGTCG  | TGGTGCGAGG  |
| 136 | 2552506..2552845 | 1.88E-05 | TGCGGTCATT | TCGTTACCTTCCGTTACCC  | GAGGTTTCGT  |
| 137 | 1056800..1057128 | 1.88E-05 | AAGATCTGCA | ACATTACATTCGGTAATCT  | AGCTGTATCG  |
| 138 | 8720424..8720746 | 2.16E-05 | AGTTGCCATT | CCAAAACGTGTCGGTGACGA | AGCGTCGTCC  |
| 139 | 8512657..8512941 | 2.16E-05 | CGCGGCCCTT | GAGTCACGCTCCGTAGCTA  | CTTAATGTCC  |
| 140 | 8452173..8452447 | 2.16E-05 | GACGCTTCCT | AAGTGACTATAAGTGACCT  | CTTGGGCATC  |
| 141 | 5732393..5732648 | 2.16E-05 | GTGGGCTCCG | CCGTCACCGGTGGTAACCG  | TTGTGCCGGG  |
| 142 | 5539798..5540064 | 2.16E-05 | CGGCGCCAGC | AGGTCACCGCCGGTGAGCA  | CCGTGAACAG  |
| 143 | 4369604..4369922 | 2.16E-05 | CGTGACGATC | TCGTTACAGAGAGTCGCGA  | TGCCGGTGGT  |
| 144 | 3989836..3990099 | 2.16E-05 | ATGTGACCAG | AGGTGACGTAGTGTACGA   | GGTGCATGTC  |
| 145 | 2380681..2380960 | 2.16E-05 | CGTGAGAGCG | GCAATACTGAGAGTGACCT  | TCCCTTTCAC  |
| 146 | 1219329..1219588 | 2.16E-05 | TTCCGTGACC | TGCTCACGGGCGGTGACAA  | GATCTATCAC  |
| 147 | 993227..993507   | 2.16E-05 | CCAACACTTG | TAGTAACTGTCTGTATGG   | AGTTCTCGGC  |
| 148 | 354391..354667   | 2.16E-05 | ATGGCGATCT | TCGTTACGGTCGGTCTTGA  | ACTATCGGTT  |
| 149 | 205525..205792   | 2.16E-05 | GTGTCACCG  | CCGTGACCGCGGTGATCT   | CACCCAGAGC  |
| 150 | 8505092..8505357 | 2.47E-05 | TGTACACGCA | TGACTACGCTGCGTGAATT  | GTTAGCCAG   |
| 151 | 6761416..6761688 | 2.47E-05 | TGGCACCTGA | TTGACACGCGGCGTGACCG  | ACACACGGCG  |
| 152 | 2763391..2763698 | 2.47E-05 | TTCATATGTA | TGGATACCGTAGGTGATCG  | GATGCCGGTT  |
| 153 | 1254784..1255042 | 2.47E-05 | TACGTCCGAA | AAATTACGCCGGGTACCG   | ATAATTTTAC  |
| 154 | 1176103..1176391 | 2.47E-05 | AGTGTCAGCT | TACTCACTCAGAGTTACTC  | GTGCCATACG  |
| 155 | 7866639..7866923 | 2.82E-05 | AGCGGGTTGA | CCGCTACTGAACGTCACGA  | ACACCGTGTG  |
| 156 | 7744835..7745106 | 2.82E-05 | TCCGTGTTGC | CGGCCACCCAGAGTGACAC  | ACCTCACCCA  |
| 157 | 4271531..4271786 | 2.82E-05 | GTTGTAGGCC | GCGTTACGAGCCGTGACCG  | TCTCCCCGGA  |
| 158 | 2487754..2488064 | 2.82E-05 | GTGGCCATGA | TCGTGACGGTGTGTGTTGG  | TGCGGTAGTA  |
| 159 | 5351129..5351391 | 3.21E-05 | CTTGTTTACG | CCTTCACGCATCGTGAAGT  | TCACATTGGT  |
| 160 | 2790196..2790560 | 3.21E-05 | TTCG       | ACGTCACCCCCGGTGAGGG  | ATTTCGATCCC |
| 161 | 2328090..2328352 | 3.21E-05 | GCGCTTGAAT | CCGACACTCGCTGTGACGA  | ATCGCTCACC  |
| 162 | 250302..250609   | 3.21E-05 | CCCGGCCATT | CGATCACGGGGCGTTAACG  | GTCATCAAGC  |
| 163 | 226586..226880   | 3.21E-05 | GTCGGTGAAC | GCGTCACCCGCCGTGAACA  | CGAAGATCAG  |
| 164 | 2594..2851       | 3.21E-05 | TCGATGTGGA | CAGACACTGTGCGTCACAA  | ACTTGTCCAC  |
| 165 | 7526992..7527364 | 3.65E-05 | CGCATTTACA | TAGTCACAGAGAGCAACCG  | CAACGCGCCC  |
| 166 | 5940636..5940892 | 3.65E-05 | GGCGGAGTGT | CGTTACAGTGGCGTCACCA  | GCCGGCGGTC  |
| 167 | 5085477..5085740 | 3.65E-05 | TTTCCATTAA | CCATTACACCTAGTAACCT  | TCGACAGACT  |
| 168 | 4266294..4266554 | 3.65E-05 | ACCGGCTCCA | CCGTCACCGTCCGCAACGT  | CTCCTGGAAC  |
| 169 | 8657215..8657471 | 4.15E-05 | CAACCGCGGC | CGGTCACCGCGGGTCAGCA  | GCAGGCCCGA  |
| 170 | 8069961..8070241 | 4.15E-05 | CCGGCTAGTG | TCGTCGCCGTGCGTCACTA  | CGCCGCGTAT  |
| 171 | 7906062..7906445 | 4.15E-05 | AACCGGAAGG | TGCTCACGATCCGTTACAG  | AAACACGGTC  |
| 172 | 4014185..4014518 | 4.15E-05 | TGAACTCAAT | ACATCACGAAAAGTATCGA  | TGTCGTGACG  |
| 173 | 3597235..3597545 | 4.15E-05 | TGGCAGTTCC | ACGCCACTCACCGTATCGA  | CGGCCGTCAC  |
| 174 | 2363786..2364044 | 4.15E-05 | CCACTCAAGG | CCATCACCCCTCCGTAAAAC | GCGCCCGGAA  |
| 175 | 424760..425029   | 4.15E-05 | TGTTACCAGG | CAGCGACTTTCGGTAATCA  | AATCACCTCG  |
| 176 | 139999..140270   | 4.15E-05 | CATCCCGTTC | TCGGCACTCTGCGTGGTCA  | GTGATCCGCG  |

---

|     |                  |          |             |                      |             |
|-----|------------------|----------|-------------|----------------------|-------------|
| 177 | 8666142..8666430 | 4.70E-05 | GATCCAAAGG  | TCGTGGCGGTGCGTAATCT  | TTTTCCGGAT  |
| 178 | 8514945..8515293 | 4.70E-05 | GGCGAAACCG  | TGGTGACGGCTGGTGACTT  | CAACGTCACG  |
| 179 | 6362675..6362935 | 4.70E-05 | CACGGTGTTG  | CCGTTGCTCAGCGTCACGT  | TCCGCTTCCA  |
| 180 | 6019970..6020320 | 4.70E-05 | CCAGGGTCCA  | CGATGACGGTGCCTGTGCG  | CTCATCCGGC  |
| 181 | 4054167..4054424 | 4.70E-05 | TGTCAGCCGT  | TCACTACTGTGCGTAGCTA  | TGCACGGAAC  |
| 182 | 10826..11194     | 4.70E-05 | CACTTGCCCTG | GAATCACCTTGAGTAAGGG  | TTAACAGTGA  |
| 183 | 8362838..8363113 | 5.31E-05 | CGCTCGTCGT  | CAATTACAGAGAGTGGCCC  | CAGGATGCGG  |
| 184 | 7886041..7886302 | 5.31E-05 | CCCCGGGTC   | ACGTCACCCGCCGTAGCGG  | GAAAGCTCTG  |
| 185 | 5976115..5976409 | 5.31E-05 | GGTAACGAGG  | CGGTCACTGAGGGCTACGG  | TCACGCCGGT  |
| 186 | 1861159..1861414 | 5.31E-05 | CGCGGTCGCA  | ATCTGACTCTCCGTACGA   | TCCGCTCTTC  |
| 187 | 1441637..1441893 | 5.31E-05 | ACCAGGGCG   | ACGTCACAGGCCGTGGTCA  | GCGTAGTCTC  |
| 188 | 368463..368812   | 5.31E-05 | TCGAAGTAAA  | TGGTGACAATCGGTAACAG  | CGGACGTGCG  |
| 189 | 8135487..8135760 | 5.99E-05 | GTAGTCACTT  | AGGTTGCGCCGCGTGACCG  | TGACCGGTGA  |
| 190 | 3798364..3798628 | 5.99E-05 | CCACCCCAT   | CCGTACGTAGAGTCGCAG   | ACCGTCCGGG  |
| 191 | 3082315..3082574 | 5.99E-05 | TTGCTGTGAC  | AACTAACTTAGAGTGATAA  | CTTACTCGCG  |
| 192 | 8525509..8525794 | 6.74E-05 | CGTACCCGTT  | CGATAACACAGCGTGCCGA  | AAAGTCAGAC  |
| 193 | 7081702..7081962 | 6.74E-05 | CCACGCCCG   | GCCTCACCGAGAGTGGCCG  | CCGCGTCGAA  |
| 194 | 6155744..6156048 | 6.74E-05 | TGACGTCAGG  | CCGTCACTCCTCGTATCGG  | GGAACGGCCA  |
| 195 | 4410962..4411307 | 6.74E-05 | CCCTGAAAGT  | CGACTACGCACCGTAGCGT  | AGTCACCCCG  |
| 196 | 4265782..4266047 | 6.74E-05 | CGCCAGGTGA  | TCGACACGAGCCGTAACGG  | CGGCGCGAGC  |
| 197 | 2689490..2689766 | 6.74E-05 | CACCCTGGAG  | TGGTGACACTGCGTTGCCT  | GCTTGTGGAC  |
| 198 | 1808521..1808804 | 6.74E-05 | CGTCAATCAT  | CAGCGACGGCGAGTGACCG  | CCTCCGGCTC  |
| 199 | 1750664..1751040 | 6.74E-05 | TCCGTGAGCA  | TGATCACCGAGCGTCCCGT  | CCGCCGACGG  |
| 200 | 289693..290013   | 6.74E-05 | GTGACGATCT  | CCTTCGCGCTGCGTAACGT  | CGTGGACACC  |
| 201 | 8447425..8447705 | 7.58E-05 | GACCGCTGAA  | TTGTCACTAGCGGTCACGG  | CATTTCTGGT  |
| 202 | 873292..873554   | 7.58E-05 | TGAATCCGTT  | TGCCTACGCTGAGTAATTC  | CGGCGTGGTA  |
| 203 | 730583..730957   | 7.58E-05 | GAGAGAAGGA  | GGATCACTGTGCGTACCGT  | CCTCGTGTGC  |
| 204 | 595894..596164   | 7.58E-05 | ATCGGGTACG  | TGGTCGCACACGGTGACCC  | GGTCGAGCGT  |
| 205 | 8485715..8486036 | 8.50E-05 | GGTCGCGGTG  | GCCTCACCCCTCCGTGTTCC | GGTCGGTCGC  |
| 206 | 8462486..8462752 | 8.50E-05 | CGTAGTTGGG  | TGATTACGCAACGTTGTCC  | CTCAAATACG  |
| 207 | 8406748..8407032 | 8.50E-05 | CGTCATACTC  | CGGCTGCGGAGCGTAACCA  | GGCTCGGGCG  |
| 208 | 8378713..8378970 | 8.50E-05 | GCTGATGAGC  | CGGCTACCCGCTGTAATCA  | TTCTGACCGA  |
| 209 | 8186072..8186327 | 8.50E-05 | GTCGTCAAGG  | CGGTCACGGCGCGTAGCTC  | CGATGAGGAG  |
| 210 | 5267540..5267839 | 8.50E-05 | TACCCGTCAA  | AAGTGACGCACCGTTGCGG  | GTCGATCCCC  |
| 211 | 1751762..1752032 | 8.50E-05 | TGATCACTTC  | CGACTACTGTCCGTCACTC  | TTTGGATTGA  |
| 212 | 1649128..1649396 | 8.50E-05 | TTGTCCGGGC  | TCCTCACCTTCCGTATCCT  | TGCCACCCTC  |
| 213 | 1488864..1489140 | 8.50E-05 | CCGGCTGTTA  | CAGCCACCGACCGTCACAG  | CCCGAGGTCCG |
| 214 | 1358859..1359165 | 8.50E-05 | CAGCATCTTG  | TGATCGCTGTCCGTATTCA  | TCCACGGGGA  |
| 215 | 762712..763005   | 8.50E-05 | GTGGGTGATA  | TGGCGACCCTCTGTGAGCA  | GGCGGAATGC  |
| 216 | 7791515..7791776 | 9.51E-05 | ACGAGGTGAA  | CAGTGACCACACGTGACCG  | GCAGCCCCTG  |
| 217 | 7356973..7357307 | 9.51E-05 | GTGGGCGATG  | TCGTCACGGGCGGTGCCGG  | TGACGGCCTG  |
| 218 | 3946708..3946983 | 9.51E-05 | CCGGTGCCGG  | TGATCACCCGCGGCGACGG  | CTGCTATGTC  |
| 219 | 2795138..2795408 | 9.51E-05 | GGGCAGCGGC  | CGGTAACCGTCGGCGACCG  | GCATGCCCAG  |
| 220 | 2364900..2365249 | 9.51E-05 | AGTAGTTGAT  | CCTTCACTGAGAGCAACTG  | CCGCGCTAGC  |
| 221 | 2169162..2169427 | 9.51E-05 | GGTATCGATG  | TGATTACTCAGGGTGTGTC  | GGATCGAGGA  |

---

|     |                  |          |            |                      |             |
|-----|------------------|----------|------------|----------------------|-------------|
| 222 | 1984962..1985249 | 9.51E-05 | CCGTGGGCAA | CGAGCACGGAGAGTGGTCG  | TTCGGGCGTA  |
| 223 | 1026685..1026961 | 9.51E-05 | CGTTCGGTAG | GAATAACTGAACGTTACCT  | CTTAACTCCA  |
| 224 | 1021955..1022242 | 9.51E-05 | GACGGCGTCG | GAATCACCCAGCGTGAGAC  | ACCGCTGCTC  |
| 225 | 8387412..8387672 | 1.06E-04 | GCTGACCCTC | GGGTGACTCTGTGTAGTGG  | GGTGGCCGAT  |
| 226 | 7652398..7652677 | 1.06E-04 | GCCTTCGCCA | TCGTGACTCCTTGTGACGC  | GCTGCGTCTC  |
| 227 | 3212902..3213176 | 1.06E-04 | CTCGCCGACG | ACGTACGCCGAGCAATGT   | CCCGAGCGTG  |
| 228 | 1295021..1295279 | 1.06E-04 | CACGGCGTTG | CTGTACGTTGCGTGTGGT   | GTCGGAACGT  |
| 229 | 330581..330840   | 1.06E-04 | AGAGCCTCGT | TGGTGACGCGCTGTGAAAA  | CGGTCAAGACG |
| 230 | 7911162..7911418 | 1.19E-04 | CACTTGACAT | TGGCCACTCGGGGTAGTGA  | CACAGGCACC  |
| 231 | 7846864..7847143 | 1.19E-04 | TCTAGTCAGA | GTTCCACGCAGGGTGACGA  | CGCACCCGAC  |
| 232 | 5116789..5117061 | 1.19E-04 | CAGGGCGACG | ATGACACCGATGGTGACGG  | TCCACCCGAG  |
| 233 | 4733507..4733779 | 1.19E-04 | CAGCCCCTGG | CCAGCACGCAGCGTAGTCG  | CACCCTTGAT  |
| 234 | 2648075..2648338 | 1.19E-04 | GTCCCGGAGC | CGGTACGGGCGGTGCTGG   | TTCGACCCAT  |
| 235 | 1453450..1453821 | 1.19E-04 | CTCCAGCCCG | TGGAAACCGAACGTGACGC  | CGGGCACCAT  |
| 236 | 1321420..1321757 | 1.19E-04 | GTCGCTGTCC | TTGTCACTGCTCGTGTCCG  | CATGAAAGGT  |
| 237 | 1080600..1080864 | 1.19E-04 | AACGAAACCT | GCGTCACAATCAGTCACGC  | CC          |
| 238 | 361392..361638   | 1.19E-04 | TGGCCTCAAG | GCGTCGCTGAGTGTGATGT  | CCGATCCGGC  |
| 239 | 310469..310784   | 1.19E-04 | TGGCCTCGG  | AGGTAGCTGTGCGTGACCC  | CCTAGCGGAG  |
| 240 | 8168913..8169278 | 1.32E-04 | GAAAGAGTTT | GCCTTACGGTCCGTATCTA  | TGTGAAGGAC  |
| 241 | 7674971..7675236 | 1.32E-04 | GGTCATGGCA | CCAGCACTCCACGTGATCG  | CCGGGCCTGG  |
| 242 | 4272615..4272929 | 1.32E-04 | TGAGCTGTGA | CGGATACCAAGTGTGAGCA  | TGGTTGACGC  |
| 243 | 3112623..3112892 | 1.32E-04 | CGATCATCGA | TGGTTACGGGCTGTGGCAG  | GTCGGGGTGC  |
| 244 | 2879582..2879837 | 1.32E-04 | GTGGTTTTTG | CAGTCACGGGGAGCAACTG  | TACCATCCGA  |
| 245 | 2211577..2211849 | 1.32E-04 | CTCGGCTCTT | CGGTGACTGTGTGTTGCTG  | GGGTGGCCCC  |
| 246 | 1965600..1965892 | 1.32E-04 | CATCCGTGCG | GGGTGACGCGCGGTACGT   | GAAGCGGAAC  |
| 247 | 949656..949915   | 1.32E-04 | TAAGTAAGAT | CCGTGACTGAGCGCTACCT  | CGTCTGAACG  |
| 248 | 740983..741245   | 1.32E-04 | CCCTGAGCTG | CGGTTACTCACCGCTATCC  | CACTGTCGTG  |
| 249 | 8528804..8529066 | 1.47E-04 | AGGCGACACT | TCGTTACAAGGCGTAGCCG  | GCTGCCACGA  |
| 250 | 6610261..6610644 | 1.47E-04 | CAAGTGATAG | ATATCACAATGGGTATCCA  | GTGCCGCCCA  |
| 251 | 5560011..5560319 | 1.47E-04 | AGCGGCGCCA | CGAGTACCCCGCGTGACTG  | ACCCGCTCGC  |
| 252 | 2386332..2386598 | 1.47E-04 | CACCGGGGGA | TTGACACCGAACGTAACAT  | ATCAAATATC  |
| 253 | 2106157..2106477 | 1.47E-04 | GAACCGTCCT | GGACCACGCAGGGTGAGCC  | CCCGCTCGTG  |
| 254 | 1821745..1822005 | 1.47E-04 | TTTGAACGCC | TTGTTACAACCTGGTGACGA | CGTCATCATA  |
| 255 | 763142..763403   | 1.47E-04 | CACGGAATTG | GAATCACTCGGTGTAGCCA  | AGCTATTTAC  |
| 256 | 8755310..8755587 | 1.63E-04 | CACATTCTTG | GCATAACCGTAAGTGCCG   | AACCCACTAC  |
| 257 | 6624245..6624509 | 1.63E-04 | GGTGGTAGTC | ATGTCACTGACAGTAGGAA  | ATCGTTAACG  |
| 258 | 5214684..5214944 | 1.63E-04 | GGCTCCGTAA | CACTCACTGTGAGCGACGC  | CTCCCACGGT  |
| 259 | 3966381..3966763 | 1.63E-04 | AAACTAAGAT | CAATCACTCTCCGTGGGAC  | AGAACCGAGT  |
| 260 | 1526402..1526762 | 1.63E-04 | CTCAATCCGT | CAGTCACTCAACGTTGAGG  | AGCCCGCAGG  |
| 261 | 1163827..1164099 | 1.63E-04 | TCCAAGGCG  | AGCCTACTGTGCGTAAGCT  | GCCGCGGTTC  |
| 262 | 1126261..1126534 | 1.63E-04 | AGGTTAATCC | CGATAACGGGCTGTCAATTT | GATCGCAGCT  |
| 263 | 8320551..8320818 | 1.81E-04 | CAGTCCGTCA | CGGTACGGTGGGTGCGCC   | GCCCCGTGGTG |
| 264 | 5403424..5403790 | 1.81E-04 | GCGCCCCGA  | GGATTACCTTTCGTGTCCG  | CCGCCACAGT  |
| 265 | 2343362..2343627 | 1.81E-04 | GACGTTCCGC | CAGGCACGGAGAGTAGTCG  | TTAGGCACTG  |
| 266 | 1552477..1552749 | 1.81E-04 | TGTAAACCTC | CCATCGCCTTCTGTGATTG  | TGCCCCTCGC  |

|     |                  |          |             |                      |            |
|-----|------------------|----------|-------------|----------------------|------------|
| 267 | 847230..847533   | 1.81E-04 | AACGTAGCAT  | CCTTCACTCACCGTTCCCG  | ACCCGTAACG |
| 268 | 719203..719467   | 1.81E-04 | TCTGTAAACG  | CATCAACGCAGCGTCACCG  | TGTGTGTATC |
| 269 | 87978..88232     | 1.81E-04 | AGAGGTTTTTC | TCCTGACGCATCGTTAACG  | GTATTTGTCC |
| 270 | 7805256..7805598 | 2.00E-04 | TCACGCGGGA  | CGACAACGGGGTGTAAC TA | GTACGACGGG |
| 271 | 7722472..7722823 | 2.00E-04 | GTTACAGCCG  | TGATCACGTCCCGTGCCAA  | GCTGGATTAA |
| 272 | 6241659..6241938 | 2.00E-04 | CGCCGCTGAA  | CACCTACTTAACGTAACGG  | GCGGAGGCAC |
| 273 | 4959030..4959286 | 2.00E-04 | CATCCCCGTC  | AAACCACCCTAAGTAGTGA  | ATTAGTTACG |
| 274 | 1824578..1824835 | 2.00E-04 | AGGTTTCGCC  | GCGTCACGGAGATTGACCG  | AACGGACTAG |
| 275 | 430249..430585   | 2.00E-04 | CGCAGTGGGT  | CCAACACGCTCTGTGCGTGA | CATCTGGGTG |
| 276 | 360981..361267   | 2.00E-04 | GACAGCGAGG  | TAGTCGCCCATCGTCATGT  | CGTCGAACGA |
| 277 | 8642381..8642649 | 2.21E-04 | CAAGAGCGCA  | ACGCTACGTAAAGTAATTC  | TCGCCGAGGG |
| 278 | 7852533..7852823 | 2.21E-04 | GGACTTGAC   | CGAATACTCACCGTATGCG  | ATGGAGCGCC |
| 279 | 5067083..5067351 | 2.21E-04 | CCTCGTCAGC  | CCATCACGGGTCGCAATCG  | GGTCTGTGCG |
| 280 | 1654530..1654837 | 2.21E-04 | ACGACATCTC  | CGGTAACGGTGCGTACACG  | CACATGACCA |
| 281 | 1355945..1356216 | 2.21E-04 | TTCCGCCATT  | CATTCACTCCACGTAGTGA  | TTCGCTACCA |
| 282 | 8534120..8534389 | 2.44E-04 | ACCTCAACGA  | CAGCAACCACCGTCAACA   | AGTCACCATC |
| 283 | 8520462..8520749 | 2.44E-04 | GGTGCGGGCA  | TCGTACATATAGCGATTT   | GTCCGTTTAC |
| 284 | 3841135..3841418 | 2.44E-04 | ACCGGCGGCG  | TGGACACCGACGGTGAGAC  | CGACGGCGAC |
| 285 | 522107..522477   | 2.44E-04 | CACGTTGAGT  | CGAACACTGCTGGTCACCG  | GCGGCGCCGG |
| 286 | 187562..187916   | 2.44E-04 | ACCTGCTGAA  | AGAACACGCGGAGTCACTC  | ACTGCGCGAT |
| 287 | 93945..94327     | 2.44E-04 | CGGCCGGCCT  | TGGTCACTCCCCGTACGCT  | CTGATGGGCC |
| 288 | 41573..41887     | 2.44E-04 | CCATCGAAGA  | ATGTTGCGGAACGTCACCA  | TCGCCGATCG |
| 289 | 8167186..8167456 | 2.68E-04 | AAGCCGATTG  | TCATCACCGCAGGTACACAC | CCGAGAGGGT |
| 290 | 7463467..7463722 | 2.68E-04 | TTTTTCAAGC  | TCACCACCAGGGGTGATGC  | CACGATCACT |
| 291 | 7041161..7041454 | 2.68E-04 | TGAGATCAGC  | GTATGGCGGAGCGTAACGA  | CAGGGATCAC |
| 292 | 6963157..6963539 | 2.68E-04 | TTTGAGGCAT  | GCCTTACCCTAATGTAATGG | ATCTTTCTGG |
| 293 | 5438090..5438400 | 2.68E-04 | GCTGGTTACC  | TCTTGACTGTTGGTCAAGA  | AGCGCTTCGG |
| 294 | 5213501..5213788 | 2.68E-04 | CTTGAGACC   | TGCTCACCCAGGGTGCGGG  | TGTCCTTCCA |
| 295 | 3108370..3108729 | 2.68E-04 | GATGGTGACT  | TGTTGACGGTGGGTTGCTG  | TCGTTGAGGT |
| 296 | 1592069..1592446 | 2.68E-04 | GGCGTCTCGC  | AACCTACGTTGAGTAAGCA  | GATTACACCC |
| 297 | 977136..977432   | 2.68E-04 | CCGGCGGGAG  | TCACTACCGTGGGTGCTCG  | CACAGGGTTG |
| 298 | 8420679..8421010 | 2.95E-04 | ACTGCCATCC  | CGCCACCCTGAGTCTTGA   | TGGTTCGGGT |
| 299 | 6233515..6233773 | 2.95E-04 | GCGGTGGTCA  | TGGTCACCGCCCTTGATCA  | CTCTGCGTTG |
| 300 | 3346984..3347296 | 2.95E-04 | ATAGCGCGAA  | AGCACACCGAGGGTGCCCG  | GTATGCGAAG |
| 301 | 3272827..3273115 | 2.95E-04 | TGAAGTCGTT  | CGGTCACGATGAGTTCCAT  | CAACGACGAG |
| 302 | 2080681..2080944 | 2.95E-04 | GCGATGTCGA  | CGCTGACCAAACGTCACAA  | ATAGTCGAAG |
| 303 | 5955661..5956043 | 3.24E-04 | CCTGTTAACC  | GCGTTACGGTGAGTGCATG  | AACGCACCGG |
| 304 | 8087075..8087373 | 3.56E-04 | CAGGCCATCG  | TCGCCACGCTCGGCTACGT  | CTTCTCGCCC |
| 305 | 7137966..7138278 | 3.56E-04 | GGCTTTTCGT  | TGCTCACGTTCTGTAGATA  | CGCCCCTTCA |
| 306 | 7040470..7040805 | 3.56E-04 | CGTAA       | CGACCACGGAGCGTTTCTC  | GGTTACCAAG |
| 307 | 2654532..2654820 | 3.56E-04 | AGCTGTCTGG  | TTCGGACCGTCCGTGACCA  | GCAACTACCC |
| 308 | 2548123..2548393 | 3.56E-04 | AGGAGTGCCA  | GAACTACGCGGAGTCACTG  | CGTCGGAATC |
| 309 | 2546727..2547044 | 3.56E-04 | CCGAGGATCA  | GCCTCACTTTGAGCGATTG  | CTCGGTGACG |
| 310 | 749647..749977   | 3.56E-04 | AGATGAGCAA  | CCGCTACGAGCTGTACGA   | TGGGCCGCTG |
| 311 | 139556..139818   | 3.56E-04 | GTCATGCAGC  | CCACTACGCTGTGCAATCT  | CGCATGTGGG |

---

|     |                  |          |            |                      |             |
|-----|------------------|----------|------------|----------------------|-------------|
| 312 | 8235173..8235552 | 3.90E-04 | GGCGCTGTCT | CCGTCACGCATGGCATCGG  | TAAGCCCTTG  |
| 313 | 3622897..3623225 | 3.90E-04 | CGCCATCGGG | AGTCAACCATCCGTGACGT  | AAAGATGAGC  |
| 314 | 931659..931925   | 3.90E-04 | CTTGACATGG | TGGTTGCGGAGTGTGAATC  | TAGAAGCACG  |
| 315 | 98496..98761     | 3.90E-04 | AGGCCGCCGT | TCACCACCTGTAGTCACTA  | AGTTATTACC  |
| 316 | 5232967..5233333 | 4.26E-04 | TTCGTAATTG | TTTTAACTCCGGGTGTCGA  | TTGATTGGCC  |
| 317 | 4824710..4824973 | 4.26E-04 | CGGGTGGATT | CGGCCGCATACCGTGATCT  | GCTGTCCTGG  |
| 318 | 7297693..7298067 | 4.65E-04 | GGAGCGAAAA | CGCCAACGGCCCGTTACCA  | GGATCCTGAT  |
| 319 | 7023985..7024274 | 4.65E-04 | CACAGTCGAA | TAGCGACAGAGGGTGAAAG  | GTTGAGGTCC  |
| 320 | 4825530..4825845 | 4.65E-04 | CAGCCGAGAA | TACATACGCTCAGTGTCGC  | ATTGACTACA  |
| 321 | 4088983..4089241 | 4.65E-04 | CGCGTCAGTC | TGTCGACGCTTCGTGTTGA  | GTTGTCACTT  |
| 322 | 849737..850015   | 4.65E-04 | CAGTAGCTCC | GAGTGACCCGCGGTGGTGC  | TGCTTCGCGG  |
| 323 | 44614..44993     | 4.65E-04 | CCAAGCGCAA | CAGAAACGCACCGTGGGGG  | GTTTCGGGGG  |
| 324 | 8585740..8586008 | 5.08E-04 | ACTTTGACAG | AGAGAACGCTCCGTACAT   | CATGAGTGAG  |
| 325 | 7507182..7507438 | 5.08E-04 | TTCATCAAGG | TCAATACGTGGGGTAAATG  | TCACCCAGGT  |
| 326 | 7211385..7211658 | 5.08E-04 | CCCCGTCAAC | TCAACACGTGCCGTCAACT  | CACAGTAGGC  |
| 327 | 1430658..1430981 | 5.08E-04 | CGTCACGACA | TCGACACTATGAGTTGTGC  | AAGTTGCACG  |
| 328 | 939736..940004   | 5.08E-04 | GTTAGCGTCT | AGGTGACGAGGGGTGAATC  | AGCAAAGTTC  |
| 329 | 7499624..7499886 | 5.53E-04 | CCGCGCTTGG | AAAGCACAGGCAGTAACGT  | GAAGCACCAT  |
| 330 | 1573538..1573817 | 5.53E-04 | TCATGATCTA | AGACTACGCGCAGTGCCCG  | TCCGAACGCA  |
| 331 | 8686973..8687341 | 6.02E-04 | CGTAGGCACA | CGAGCACGTACGGTAGTTG  | GAAAAGAGAG  |
| 332 | 6242786..6243052 | 6.02E-04 | GCGGTAGCGG | GGGTACAGCTGGGCGCCCG  | TACAGTGGTT  |
| 333 | 5730025..5730262 | 6.02E-04 | CGCCGCGGGG | ACAGCACACTCTGTGGCCG  | GAAGGGGCCG  |
| 334 | 1007267..1007618 | 6.02E-04 | GGTGTGGGCA | CCGCCACCCCGGTGGCGC   | GAAATACTTC  |
| 335 | 8531011..8531289 | 6.54E-04 | ATCAGCC    | GGATCACCAACTGCCATCA  | CGGGCATCGC  |
| 336 | 549631..550012   | 7.10E-04 | TACCGCCTGG | ACGTGGCGTTTCGGTGTCGA | GCCCGTTTAA  |
| 337 | 71932..72260     | 7.10E-04 | GGGGGTGCCA | TCGTTGCGTACCGTTTCGT  | TATCTCTTGC  |
| 338 | 6468886..6469183 | 7.69E-04 | AGGACTCCGG | CCGTGACACCTTGTAGCGG  | ATCAAACCGT  |
| 339 | 3416004..3416317 | 7.69E-04 | CGCCACTGGT | TGATTACGTCGCGGAGGC   | CGTGTCGCCT  |
| 340 | 8492249..8492625 | 8.33E-04 | GCGGTGGCAC | CCGCTGCGGAAGGTCATCG  | CGCGGTCTCG  |
| 341 | 1063647..1063902 | 8.33E-04 | AGGGGCGGGC | GGCGGACGCAGAGTGAGCG  | CAGGGCACCG  |
| 342 | 5233539..5233863 | 9.01E-04 | AGAAGTGCCG | GTATTGCGATGGGTGACGC  | TGGCCTTGAC  |
| 343 | 3960276..3960541 | 9.01E-04 | AGGAAATCCT | CCGAAACTTTCAGTTTCTG  | CGGTTTCAGCG |
| 344 | 467387..467654   | 9.01E-04 | TTGAGGGCAT | GGTTAACGGCTGGTGACGC  | CTATTGCGCC  |
| 345 | 1846550..1846791 | 1.13E-03 | GCACGTGAAG | GTGCCACTCGGCGGATCG   | CCGATGATCT  |
| 346 | 4326961..4327218 | 1.41E-03 | AGCCGTTTGA | ACGTCACTGTGGGCACGCG  | TGGTCGACGG  |

---

**Table S5.** List of the AmBldD target gene candidates.

a. The position of the central nucleotide of each AmBldD box is shown. The transcriptional start points predicted by previous RNA-Seq analyses were set as +1. The highlighted transcriptional start points of four genes (*AMIS6880*, *AMIS65300*, *AMIS62190* and *AMIS78290*) were determined by 5'-RACE. The RNA samples for the qRT-PCR experiment were used for the 5'-RACE experiment. The RNA-Seq analyses were performed using RNA samples prepared from the cells cultivated on HAT agar for 1, 3, 6 and 40 days (19).

b. Expression levels (RPKM) of each gene in the RNA-Seq analyses. Values above the threshold (RPKM > 200) are highlighted.

c. Amino acid sequence identity (left) and similarity (right) of each gene product with its orthologues (or homologues) in *Actinoplanes* sp. SE50/110 (ase), *Actinoplanes* sp. N902-109 (actn) and *Actinoplanes friuliensis* (afs) are shown. Values above the threshold (identity > 70%) are highlighted. "-" indicates that no homologue was found using the BLAST algorithm of the CLC Genomics Workbench (e-value < 0.0001).

| Locus tag<br>(AMIS number) | AmBldD box <sup>a</sup> | RPKM <sup>b</sup> |        |        |        | Identity / Similarity <sup>c</sup> |       |       | Definition                                                             | Classification                                      |
|----------------------------|-------------------------|-------------------|--------|--------|--------|------------------------------------|-------|-------|------------------------------------------------------------------------|-----------------------------------------------------|
|                            |                         | Day 1             | Day 3  | Day 6  | Day 40 | ase                                | actn  | afs   |                                                                        |                                                     |
| 660                        | 40                      | 128.1             | 16.4   | 11.8   | 3.1    | 38/58                              | 44/59 | 44/62 | putative subtilase-family protease                                     | 4.6 miscellaneous                                   |
| 780                        | 30                      | 138.9             | 194.8  | 180.2  | 136.0  | 87/92                              | 85/92 | 88/94 | putative branched-chain alpha keto acid dehydrogenase E1 alpha subunit | 2.2 metabolism of amino acids and related molecules |
| 830                        | -23                     | 618.6             | 574.7  | 360.9  | 105.1  | 98/99                              | 91/96 | 89/97 | putative heat shock protein Hsp70 (DnaK)                               | 4.1 adaptation of atypical condition                |
| 1980                       | 25                      | 48.0              | 2555.1 | 936.5  | 101.2  | 97/99                              | 89/95 | 95/98 | putative MerR-family transcriptional regulator                         | 3.5.2 regulation                                    |
| 2230                       | -77                     | 22.0              | 13.0   | 13.5   | 10.2   | 45/71                              | 50/77 | 40/63 | putative GntR-family transcriptional regulator                         | 3.5.2 regulation                                    |
| 2990                       | 23                      | 155.0             | 43.0   | 28.8   | 12.3   | 98/99                              | 91/97 | 93/98 | putative IclR-family transcriptional regulator                         | 3.5.2 regulation                                    |
| 3140                       | -26                     | 56.3              | 52.8   | 45.0   | 30.5   | 88/95                              | 86/93 | 88/94 | putative haloacid dehalogenase-like hydrolase                          | 4.6 miscellaneous                                   |
| 4020                       | -84                     | 249.9             | 43.4   | 46.5   | 25.8   | 70/80                              | 64/78 | 64/79 | hypothetical protein                                                   | 5 similar to unknown proteins                       |
| 4030                       | -97                     | 229.7             | 39.3   | 48.3   | 33.0   | 62/77                              | 59/72 | 61/77 | hypothetical protein                                                   | 5 similar to unknown proteins                       |
| 4090                       | -140                    | 1.8               | 91.1   | 35.8   | 161.6  | 72/78                              | 72/80 | 67/82 | putative cysteine dioxygenase                                          | 2.2 metabolism of amino acids and related molecules |
| 4100                       | -115                    | 82.3              | 25.2   | 24.5   | 35.9   | 57/73                              | 48/63 | 49/62 | hypothetical protein                                                   | 5 similar to unknown proteins                       |
| 4820                       | -127                    | 103.3             | 38.4   | 33.9   | 15.1   | -                                  | -     | -     | hypothetical protein                                                   | 5 similar to unknown proteins                       |
| 4830                       | 40                      | 125.3             | 93.9   | 78.5   | 42.7   | 81/91                              | 26/44 | 31/47 | putative NAD-dependent epimerase/dehydratase                           | 4.6 miscellaneous                                   |
| 5080                       | -142                    | 250.5             | 61.2   | 52.5   | 41.3   | 66/77                              | 71/82 | 72/83 | putative 5'-nucleotidase                                               | 2.3 metabolism of nucleotides and nucleic acids     |
| 5280                       | -153                    | 15.3              | 107.4  | 65.8   | 26.3   | 69/76                              | -     | 57/69 | hypothetical protein                                                   | 6 no similarity                                     |
| 6500                       | -127                    | 43.6              | 15.7   | 14.8   | 12.6   | 69/78                              | 55/68 | 55/66 | hypothetical protein                                                   | 5 similar to unknown proteins                       |
| 6510                       | -76                     | 312.1             | 48.4   | 44.6   | 37.8   | 75/81                              | 70/77 | 79/89 | putative sensor-like histidine kinase                                  | 1.3 sensor                                          |
| 6800                       | -159                    | 968.9             | 106.6  | 91.7   | 43.4   | 86/93                              | 78/86 | 78/86 | putative ABC transporter substrate-binding protein                     | 1.2 transport / binding protein & lipoprotein       |
| 6880                       | -172 and -150           | 670.6             | 1351.1 | 631.9  | 225.5  | 98/99                              | 93/96 | 95/97 | putative WhiB-family transcriptional regulator                         | 3.5.2 regulation                                    |
| 6890                       | 10                      | 83.8              | 443.4  | 206.4  | 74.3   | 94/95                              | 87/90 | 86/89 | putative LuxR-family transcriptional regulator                         | 3.5.2 regulation                                    |
| 6970                       | -83                     | 379.5             | 193.2  | 136.4  | 80.4   | 91/94                              | 86/91 | 87/92 | putative NUDIX hydrolase                                               | 4.6 miscellaneous                                   |
| 7140                       | -121                    | 476.9             | 63.1   | 65.9   | 23.7   | 75/85                              | 61/81 | 73/81 | putative M23-family peptidase                                          | 4.6 miscellaneous                                   |
| 7150                       | -55                     | 199.3             | 101.2  | 95.5   | 69.0   | 95/98                              | 90/96 | 94/97 | putative isobutyryl-CoA mutase chain B                                 | 2.4 metabolism of lipids                            |
| 7950                       | -61                     | 320.7             | 78.8   | 53.4   | 19.2   | -                                  | 34/52 | 34/53 | putative restriction endonuclease                                      | 4.1 adaptation of atypical condition                |
| 7960                       | -81                     | 42.1              | 32.7   | 55.5   | 34.8   | 42/59                              | 43/60 | 46/63 | putative GntR-family transcriptional regulator                         | 3.5.2 regulation                                    |
| 8500                       | -162                    | 153.2             | 97.5   | 69.2   | 55.9   | 95/98                              | 91/94 | 91/93 | putative glycosyltransferase                                           | 4.6 miscellaneous                                   |
| 8700                       | -118                    | 10.8              | 672.2  | 876.3  | 377.1  | 72/84                              | 85/90 | 74/84 | putative S-adenosyl-L-homocysteine hydrolase                           | 2.2 metabolism of amino acids and related molecules |
| 8770                       | -117                    | 1281.8            | 1979.4 | 2169.1 | 2574.5 | 90/92                              | 84/89 | 83/90 | putative S30AE family protein                                          | 4.6 miscellaneous                                   |
| 8860                       | -40                     | 489.6             | 184.7  | 147.6  | 73.4   | 98/99                              | 97/99 | 97/99 | putative cell division ATP-binding protein FtsE                        | 1.7 cell division                                   |
| 9130                       | -23                     | 36.8              | 25.5   | 16.4   | 8.4    | 57/66                              | 63/73 | 63/74 | hypothetical protein                                                   | 6 no similarity                                     |
| 9140                       | -43                     | 102.0             | 246.0  | 73.8   | 22.7   | 78/89                              | 54/65 | 82/89 | hypothetical protein                                                   | 6 no similarity                                     |
| 9230                       | -20                     | 2496.0            | 2233.9 | 2000.7 | 1082.4 | 95/98                              | 85/94 | 86/94 | hypothetical protein                                                   | 6 no similarity                                     |
| 9260                       | 31                      | 53.6              | 44.6   | 22.4   | 10.4   | 78/86                              | 69/78 | 73/83 | putative diguanylate cyclase/phosphodiesterase with PAS sensor         | 1.3 sensor                                          |
| 9410                       | -38                     | 1692.7            | 501.9  | 917.3  | 409.0  | 91/94                              | 92/97 | 94/98 | hypothetical protein of Mov34/MPN/PAD-1 family                         | 5 similar to unknown proteins                       |
| 9450                       | -134                    | 151.1             | 241.1  | 221.7  | 50.0   | 94/97                              | 89/95 | 88/95 | hypothetical protein of metallo-beta-lactamase superfamily             | 5 similar to unknown proteins                       |
| 9620                       | -7                      | 96.7              | 101.8  | 93.6   | 81.8   | 81/91                              | -     | -     | putative S-adenosylmethionine decarboxylase                            | 2.2 metabolism of amino acids and related molecules |
| 9630                       | -163                    | 86.3              | 31.0   | 23.0   | 23.1   | 71/78                              | 62/81 | -     | hypothetical protein                                                   | 5 similar to unknown proteins                       |

|       |      |        |        |        |        |       |       |       |                                                                                |                                                       |
|-------|------|--------|--------|--------|--------|-------|-------|-------|--------------------------------------------------------------------------------|-------------------------------------------------------|
| 9910  | -138 | 1359.1 | 3194.7 | 3468.3 | 3236.2 | 87/94 | 69/81 | 68/81 | hypothetical protein                                                           | 5 similar to unknown proteins                         |
| 10100 | -100 | 176.9  | 85.9   | 62.1   | 29.7   | 69/77 | 42/60 | 67/78 | putative integral membrane protein                                             | 4.6 miscellaneous                                     |
| 10230 | -14  | 76.2   | 124.2  | 76.6   | 293.4  | 58/65 | 57/72 | 44/62 | hypothetical protein                                                           | 5 similar to unknown proteins                         |
| 10520 | -94  | 468.4  | 82.6   | 101.8  | 47.4   | 55/71 | 62/77 | 65/79 | hypothetical protein of NlpC/P60 family                                        | 5 similar to unknown proteins                         |
| 11040 | -16  | 99.6   | 225.0  | 160.0  | 223.4  | 68/77 | 67/79 | 63/78 | hypothetical protein                                                           | 5 similar to unknown proteins                         |
| 11190 | -5   | 45.0   | 30.1   | 37.1   | 11.4   | 92/94 | 55/70 | 55/71 | putative ArsR-family transcriptional regulator                                 | 3.5.2 regulation                                      |
| 11690 | -76  | 55.2   | 87.2   | 37.5   | 9.6    | 67/79 | 59/75 | 65/78 | hypothetical protein                                                           | 5 similar to unknown proteins                         |
| 12710 | -70  | 78.4   | 162.1  | 58.9   | 19.1   | 43/53 | 47/60 | 51/66 | hypothetical protein                                                           | 5 similar to unknown proteins                         |
| 12740 | -113 | 72.4   | 91.2   | 53.6   | 21.3   | -     | -     | -     | hypothetical protein                                                           | 6 no similarity                                       |
| 13400 | -18  | 650.4  | 118.6  | 131.9  | 45.8   | 88/95 | 70/85 | 72/85 | putative glyceraldehyde 3-phosphate dehydrogenase                              | 2.1.2 main glycolytic pathways                        |
| 13490 | -63  | 83.5   | 103.1  | 121.6  | 106.0  | 83/89 | 77/85 | 79/86 | putative NH <sub>3</sub> -dependent NAD <sup>+</sup> synthetase                | 2.5 metabolism of coenzymes                           |
| 13500 | -24  | 125.5  | 215.2  | 159.7  | 79.7   | 95/98 | 93/97 | 94/97 | putative glutamine synthetase                                                  | 2.2 metabolism of amino acids and related molecules   |
| 14070 | -168 | 135.5  | 37.7   | 28.1   | 12.2   | 96/98 | 90/96 | 91/95 | putative UDP-N-acetylglucosamine 1-carboxyvinyltransferase                     | 3.5.2 regulation                                      |
| 14490 | -50  | 667.1  | 260.3  | 271.4  | 161.9  | 99/99 | 93/97 | 93/96 | putative transcriptional regulator containing cyclic nucleotide-binding domain | 3.5.2 regulation                                      |
| 14500 | -23  | 10.0   | 9.5    | 9.2    | 7.5    | 72/79 | 65/77 | 69/80 | hypothetical protein                                                           | 5 similar to unknown proteins                         |
| 14670 | -30  | 223.1  | 101.5  | 72.2   | 18.7   | 92/96 | 91/96 | 90/96 | hypothetical protein                                                           | 5 similar to unknown proteins                         |
| 14860 | -169 | 603.3  | 722.6  | 1318.7 | 229.0  | 74/84 | 70/80 | 70/80 | putative succinate dehydrogenase cytochrome b-556 subunit                      | 2.1.3 TCA cycle                                       |
| 15090 | -115 | 342.6  | 116.8  | 104.7  | 97.8   | 93/95 | 90/93 | 92/95 | putative ATPase associated with various cellular activities                    | 4.6 miscellaneous                                     |
| 15100 | -33  | 79.5   | 81.0   | 97.7   | 95.2   | 87/91 | 82/89 | 82/90 | putative leucyl-tRNA synthetase                                                | 3.7.2 aminoacyl-tRNA transferases                     |
| 15140 | -62  | 260.6  | 15.5   | 22.1   | 10.1   | 68/84 | 65/76 | 69/83 | hypothetical protein of NlpC/P60 family                                        | 5 similar to unknown proteins                         |
| 15330 | -30  | 207.4  | 241.1  | 223.1  | 131.9  | 95/97 | 87/92 | 91/94 | putative TraR/DksA-family transcriptional regulator                            | 3.5.2 regulation                                      |
| 15730 | -89  | 252.1  | 605.0  | 527.8  | 210.1  | 95/97 | 88/94 | 88/93 | putative pyruvate kinase                                                       | 2.1.2 main glycolytic pathways                        |
| 16220 | -164 | 1271.8 | 1120.5 | 979.0  | 189.2  | 95/95 | 86/92 | 83/90 | hypothetical protein                                                           | 5 similar to unknown proteins                         |
| 17080 | 42   | 28.6   | 58.8   | 43.7   | 217.2  | 44/61 | 59/74 | 54/70 | putative RNA polymerase ECF-subfamily sigma factor                             | 3.5.2 regulation                                      |
| 17210 | -126 | 8.2    | 9.4    | 5.2    | 5.6    | 82/89 | 87/90 | 49/62 | putative DNA polymerase IV                                                     | 3.2 DNA modification & repair                         |
| 17900 | 16   | 8.6    | 8.9    | 12.0   | 165.9  | 57/71 | 51/66 | 44/59 | putative LuxR-family transcriptional regulator                                 | 3.5.2 regulation                                      |
| 18020 | -140 | 0.8    | 1.5    | 2.4    | 97.8   | 67/74 | -     | 29/40 | putative diacylglycerol kinase                                                 | 2.1 metabolism of carbohydrates and related molecules |
| 18030 | -28  | 1.9    | 3.8    | 28.1   | 566.7  | 51/68 | 50/68 | 50/68 | putative polyphosphate kinase                                                  | 2.6 metabolism of phosphate                           |
| 20410 | -28  | 55.2   | 32.5   | 32.0   | 24.2   | 40/54 | 51/64 | -     | hypothetical protein                                                           | 6 no similarity                                       |
| 22420 | -72  | 737.9  | 142.6  | 104.1  | 67.2   | -     | 30/48 | 56/66 | hypothetical protein                                                           | 5 similar to unknown proteins                         |
| 22570 | -54  | 62.3   | 4.2    | 1.5    | 0.3    | 35/50 | 36/49 | 36/49 | putative NUDIX hydrolase                                                       | 2.4 metabolism of lipids                              |
| 22780 | -65  | 129.3  | 76.5   | 55.4   | 22.4   | -     | -     | -     | hypothetical protein                                                           | 5 similar to unknown proteins                         |
| 22980 | -16  | 4.0    | 8.4    | 7.4    | 2.7    | 38/56 | 32/54 | 31/54 | putative acyl-CoA dehydrogenase                                                | 2.4 metabolism of lipids                              |
| 22990 | -23  | 3.2    | 5.1    | 4.0    | 2.3    | 54/68 | 56/69 | 55/69 | putative aldehyde dehydrogenase                                                | 4.6 miscellaneous                                     |
| 24370 | -181 | 53.5   | 7.8    | 5.9    | 4.0    | 75/84 | 56/69 | 82/91 | putative spore coat protein CotH                                               | 1.8 sporulation                                       |
| 24390 | -27  | 17.7   | 60.3   | 204.3  | 45.0   | 71/80 | 66/79 | 58/73 | hypothetical protein                                                           | 6 no similarity                                       |
| 25310 | 25   | 19.1   | 16.4   | 13.0   | 5.0    | 29/44 | 31/43 | 34/50 | putative TetR-family transcriptional regulator                                 | 3.5.2 regulation                                      |
| 25320 | -83  | 19.9   | 3.1    | 1.1    | 0.6    | 32/52 | 36/56 | 28/48 | hypothetical protein                                                           | 5 similar to unknown proteins                         |
| 25370 | -5   | 31.2   | 219.2  | 84.3   | 4.8    | 94/96 | 66/76 | -     | hypothetical protein                                                           | 5 similar to unknown proteins                         |
| 25380 | -140 | 14.1   | 6.4    | 3.6    | 1.8    | 52/63 | 69/78 | -     | putative sulfotransferase                                                      | 2.7 metabolism of sulfur                              |
| 25710 | -11  | 21.5   | 27.4   | 9.8    | 6.2    | -     | -     | 33/54 | putative response regulator receiver domain protein                            | 3.5.2 regulation                                      |
| 26290 | -8   | 102.6  | 24.5   | 15.5   | 6.2    | 30/42 | 35/45 | 33/46 | putative trypsin-like serine protease                                          | 3.5.2 regulation                                      |
| 28700 | -23  | 9.7    | 109.1  | 106.1  | 53.0   | -     | -     | -     | hypothetical protein                                                           | 5 similar to unknown proteins                         |
| 28800 | -60  | 11.6   | 11.8   | 15.6   | 14.3   | 68/76 | 69/81 | 74/85 | hypothetical protein of NlpC/P60 family                                        | 5 similar to unknown proteins                         |
| 28810 | -182 | 0.3    | 2.4    | 3.4    | 69.3   | 41/60 | 45/60 | 50/61 | hypothetical protein                                                           | 5 similar to unknown proteins                         |
| 29340 | -13  | 66.6   | 104.2  | 96.1   | 96.5   | 47/58 | 74/84 | 48/60 | putative alcohol dehydrogenase                                                 | 2.1.2 main glycolytic pathways                        |

|       |      |        |         |         |        |       |       |       |                                                             |                                                     |
|-------|------|--------|---------|---------|--------|-------|-------|-------|-------------------------------------------------------------|-----------------------------------------------------|
| 29540 | -64  | 25.6   | 22.1    | 19.6    | 4.6    | -     | -     | -     | hypothetical protein                                        | 6 no similarity                                     |
| 29550 | 43   | 2.0    | 1.1     | 0.4     | 1.4    | 27/42 | 29/42 | 67/75 | putative transposase                                        | 3.5.2 regulation                                    |
| 30270 | -9   | 6.8    | 78.4    | 35.7    | 30.1   | 47/63 | 50/68 | 49/72 | hypothetical protein                                        | 5 similar to unknown proteins                       |
| 31170 | -165 | 3.0    | 3.9     | 4.0     | 72.1   | 37/51 | 36/54 | 38/53 | putative methyltransferase                                  | 4.6 miscellaneous                                   |
| 31180 | -12  | 23.9   | 425.9   | 171.7   | 81.8   | -     | -     | -     | hypothetical protein                                        | 6 no similarity                                     |
| 31870 | -40  | 35.1   | 899.3   | 317.7   | 11.0   | -     | 34/48 | 34/49 | hypothetical protein                                        | 6 no similarity                                     |
| 32070 | -176 | 402.8  | 20.0    | 28.0    | 5.5    | -     | -     | 31/51 | putative transcriptional regulator                          | 3.5.2 regulation                                    |
| 32080 | -143 | 94.2   | 7.3     | 13.6    | 2.8    | -     | -     | -     | hypothetical protein                                        | 6 no similarity                                     |
| 32410 | -109 | 187.4  | 17.9    | 21.8    | 13.8   | -     | -     | -     | hypothetical protein                                        | 5 similar to unknown proteins                       |
| 32420 | -170 | 251.2  | 7.3     | 9.0     | 0.8    | 49/62 | 40/55 | 42/55 | putative NRPS-related enzyme                                | 4.3 antibiotic production                           |
| 36070 | -85  | 13.3   | 529.7   | 387.8   | 179.5  | 68/77 | 50/63 | 40/54 | putative two-component system sensor kinase                 | 3.5.2 regulation                                    |
| 36080 | -21  | 117.4  | 971.6   | 749.1   | 327.8  | 84/89 | 47/63 | 48/65 | putative response regulator receiver domain protein         | 3.5.2 regulation                                    |
| 36240 | -169 | 123.9  | 109.6   | 87.2    | 35.2   | -     | -     | -     | hypothetical protein                                        | 6 no similarity                                     |
| 36250 | -151 | 18.8   | 15.3    | 8.2     | 2.4    | 66/76 | 42/50 | 38/50 | hypothetical protein                                        | 5 similar to unknown proteins                       |
| 36260 | -99  | 18.0   | 11.3    | 6.5     | 2.1    | -     | -     | -     | hypothetical protein                                        | 6 no similarity                                     |
| 37750 | -148 | 628.7  | 9.3     | 6.4     | 3.1    | 79/88 | 71/82 | 67/81 | putative ABC transporter substrate-binding protein          | 1.2 transport / binding protein & lipoprotein       |
| 37800 | -83  | 7.6    | 159.4   | 99.8    | 16.2   | 35/49 | 32/45 | -     | hypothetical protein                                        | 5 similar to unknown proteins                       |
| 37810 | -3   | 11.0   | 12.5    | 6.0     | 1.7    | -     | -     | 40/51 | hypothetical protein                                        | 5 similar to unknown proteins                       |
| 38000 | -23  | 10.5   | 7.1     | 2.8     | 1.2    | 77/87 | -     | 35/54 | putative TetR-family transcriptional regulator              | 3.5.2 regulation                                    |
| 38260 | -8   | 65.3   | 57.3    | 49.3    | 26.5   | 63/77 | 62/72 | -     | hypothetical protein                                        | 5 similar to unknown proteins                       |
| 39800 | -65  | 110.5  | 64.3    | 43.2    | 72.2   | 62/78 | 70/82 | 73/82 | putative glycosyltransferase                                | 4.6 miscellaneous                                   |
| 41990 | -113 | 127.2  | 213.7   | 189.7   | 122.8  | 82/87 | 80/89 | 79/90 | hypothetical protein                                        | 5 similar to unknown proteins                       |
| 42610 | -184 | 39.1   | 109.4   | 54.5    | 22.0   | 68/80 | 70/83 | 46/60 | putative cadmium resistance transporter                     | 1.2 transport / binding protein & lipoprotein       |
| 44500 | -112 | 15.4   | 110.3   | 134.5   | 5.6    | 68/77 | 65/77 | 33/55 | hypothetical protein                                        | 5 similar to unknown proteins                       |
| 45340 | -40  | 100.2  | 15.3    | 12.5    | 3.3    | -     | -     | -     | hypothetical protein                                        | 5 similar to unknown proteins                       |
| 46050 | 56   | 60.3   | 36.7    | 32.3    | 15.7   | -     | 33/57 | -     | hypothetical protein                                        | 6 no similarity                                     |
| 47300 | -56  | 42.6   | 700.3   | 183.6   | 33.1   | 64/74 | 50/62 | 51/61 | hypothetical protein                                        | 5 similar to unknown proteins                       |
| 47940 | -188 | 49.9   | 7.1     | 15.4    | 7.3    | 48/64 | -     | -     | hypothetical protein                                        | 5 similar to unknown proteins                       |
| 48270 | -24  | 7.1    | 2013.2  | 1271.2  | 1445.8 | 51/66 | -     | 42/51 | hypothetical protein                                        | 5 similar to unknown proteins                       |
| 48400 | -64  | 133.7  | 270.5   | 72.5    | 14.3   | 79/90 | 81/88 | 78/85 | putative serine/threonine protein kinase                    | 2.6 metabolism of phosphate                         |
| 48760 | -112 | 0.9    | 1.5     | 0.4     | 0.8    | 55/64 | 50/58 | 50/54 | hypothetical protein                                        | 5 similar to unknown proteins                       |
| 49410 | -133 | 7.1    | 1177.1  | 1479.8  | 608.7  | 48/66 | 86/95 | 48/66 | putative ABC transporter substrate-binding protein          | 1.2 transport / binding protein & lipoprotein       |
| 49500 | -200 | 0.4    | 183.0   | 229.5   | 170.3  | 57/67 | 48/61 | 50/63 | putative two-component system sensor kinase                 | 3.5.2 regulation                                    |
| 49710 | 37   | 184.7  | 6.3     | 4.0     | 0.6    | 39/54 | 58/71 | 34/51 | putative cysteine synthase                                  | 2.2 metabolism of amino acids and related molecules |
| 49720 | -136 | 91.1   | 5.5     | 2.9     | 1.3    | 32/44 | 29/42 | 30/43 | hypothetical protein containing condensation domain of NRPS | 5 similar to unknown proteins                       |
| 50010 | -93  | 590.9  | 131.4   | 141.1   | 76.6   | 75/83 | 58/73 | 64/77 | hypothetical protein of NlpC/P60 family                     | 5 similar to unknown proteins                       |
| 50490 | -73  | 37.9   | 1.9     | 1.1     | 0.3    | 28/40 | 29/41 | 29/42 | putative oxidoreductase                                     | 4.6 miscellaneous                                   |
| 50500 | -66  | 74.2   | 4.9     | 3.0     | 0.7    | 33/51 | 39/55 | 34/50 | putative SARP-family transcriptional activator              | 3.5.2 regulation                                    |
| 50820 | -136 | 667.4  | 219.1   | 225.1   | 259.6  | 73/87 | -     | -     | hypothetical protein                                        | 6 no similarity                                     |
| 50970 | -54  | 72.8   | 17.8    | 12.0    | 5.9    | 46/62 | 66/82 | 70/83 | hypothetical protein containing YceI-like domain            | 5 similar to unknown proteins                       |
| 50980 | -94  | 44.4   | 38.5    | 19.1    | 7.7    | 60/79 | -     | -     | hypothetical protein                                        | 5 similar to unknown proteins                       |
| 51260 | -9   | 2554.6 | 605.6   | 946.1   | 506.2  | 78/88 | 75/88 | 76/86 | putative ABC transporter substrate-binding protein          | 1.2 transport / binding protein & lipoprotein       |
| 53060 | 26   | 2.7    | 2.2     | 0.7     | 0.2    | -     | -     | -     | putative LacI-family transcriptional regulator              | 3.5.2 regulation                                    |
| 53900 | -137 | 30.5   | 21811.1 | 16345.1 | 3881.9 | -     | -     | -     | hypothetical protein                                        | 5 similar to unknown proteins                       |
| 54130 | -1   | 66.4   | 36.9    | 33.2    | 19.1   | 81/89 | 66/73 | 69/79 | putative transcriptional regulator                          | 3.5.2 regulation                                    |
| 54140 | -169 | 82.1   | 141.0   | 54.7    | 7.9    | 73/84 | 69/79 | 70/79 | putative ankyrin-like protein                               | 4.6 miscellaneous                                   |



|       |      |        |        |        |        |         |        |         |                                                                        |                                                       |
|-------|------|--------|--------|--------|--------|---------|--------|---------|------------------------------------------------------------------------|-------------------------------------------------------|
| 54550 | -111 | 289.5  | 603.6  | 308.1  | 34.9   | 89/96   | 83/92  | 82/91   | putative glycosyl hydrolase                                            | 2.1 metabolism of carbohydrates and related molecules |
| 54930 | -8   | 55.1   | 332.8  | 581.3  | 1367.7 | 69/81   | 53/71  | 53/71   | hypothetical protein                                                   | 6 no similarity                                       |
| 55770 | -149 | 73.0   | 14.6   | 11.5   | 48.5   | 80/89   | -      | -       | hypothetical protein                                                   | 5 similar to unknown proteins                         |
| 55780 | -41  | 13.9   | 11.2   | 7.7    | 3.4    | 82/92   | 60/73  | 60/73   | putative dehydrogenase                                                 | 4.6 miscellaneous                                     |
| 55790 | -5   | 6.0    | 4.9    | 5.0    | 11.0   | 71/79   | 37/52  | 31/55   | putative TetR-family transcriptional regulator                         | 3.5.2 regulation                                      |
| 57520 | -108 | 42.2   | 31.5   | 20.7   | 8.3    | -       | -      | -       | hypothetical protein                                                   | 5 similar to unknown proteins                         |
| 57930 | -80  | 50.7   | 10.0   | 18.4   | 8.5    | 52/63   | 63/77  | 60/72   | hypothetical protein                                                   | 5 similar to unknown proteins                         |
| 58230 | -7   | 282.3  | 229.5  | 146.3  | 73.3   | 59/71   | 59/73  | 49/63   | hypothetical protein                                                   | 5 similar to unknown proteins                         |
| 58300 | -13  | 35.7   | 40.1   | 28.7   | 14.2   | 89/95   | 37/55  | 88/96   | putative LuxR-family transcriptional regulator                         | 3.5.2 regulation                                      |
| 59370 | -167 | 156.2  | 24.8   | 22.1   | 14.3   | 29/46   | 33/51  | 32/48   | hypothetical protein                                                   | 5 similar to unknown proteins                         |
| 61610 | -9   | 68.6   | 48.2   | 68.3   | 11.3   | 40/48   | 36/49  | 44/59   | putative methyltransferase                                             | 4.6 miscellaneous                                     |
| 61620 | -102 | 41.5   | 37.8   | 31.4   | 22.9   | 44/67   | 41/63  | 35/52   | putative HxlR-family transcriptional regulator                         | 3.5.2 regulation                                      |
| 61630 | -28  | 34.5   | 22.4   | 17.1   | 13.8   | 85/91   | 79/88  | 76/85   | putative glycosyl hydrolase                                            | 2.1 metabolism of carbohydrates and related molecules |
| 61640 | 28   | 338.9  | 37.7   | 34.0   | 13.7   | 69/76   | 62/70  | 65/75   | putative glutamylcysteine synthetase                                   | 2.2 metabolism of amino acids and related molecules   |
| 62190 | -3   | 383.6  | 324.0  | 344.9  | 436.8  | 100/100 | 98/99  | 98/99   | putative DNA-binding protein (AmblD)                                   | 3.5.2 regulation                                      |
| 62650 | -71  | 58.0   | 40.8   | 45.6   | 43.7   | 88/92   | 87/92  | 88/93   | putative serine/threonine protein kinase                               | 2.6 metabolism of phosphate                           |
| 62910 | -164 | 82.8   | 165.2  | 82.4   | 22.0   | 90/95   | 85/92  | 88/94   | putative translation elongation factor G                               | 3.5.2 regulation                                      |
| 62970 | -26  | 43.4   | 38.7   | 28.8   | 27.9   | 75/84   | 69/79  | 71/80   | putative ADP-ribosylglycohydrolase                                     | 2.3 metabolism of nucleotides and nucleic acids       |
| 62980 | -72  | 76.1   | 27.1   | 21.1   | 17.0   | 99/99   | 98/99  | 96/98   | putative two-component system response regulator                       | 3.5.2 regulation                                      |
| 63600 | -92  | 94.4   | 35.1   | 32.4   | 15.2   | 88/94   | 75/85  | 80/88   | hypothetical protein                                                   | 5 similar to unknown proteins                         |
| 64740 | -76  | 2598.6 | 6395.9 | 5147.6 | 1122.2 | 83/91   | 73/85  | 71/84   | hypothetical protein                                                   | 5 similar to unknown proteins                         |
| 64890 | -180 | 63.2   | 119.2  | 66.2   | 20.9   | 67/79   | 65/76  | 65/77   | hypothetical protein                                                   | 5 similar to unknown proteins                         |
| 65290 | -82  | 61.4   | 142.3  | 167.2  | 90.4   | 64/78   | 66/82  | 72/88   | putative membrane protein                                              | 4.6 miscellaneous                                     |
| 65300 | -35  | 29.1   | 3670.2 | 3084.4 | 1223.7 | 99/100  | 99/100 | 100/100 | putative SsgA-family protein                                           | 1.8 sporulation                                       |
| 66120 | -11  | 41.1   | 58.7   | 181.9  | 52.4   | 66/79   | 56/70  | 53/71   | hypothetical protein                                                   | 5 similar to unknown proteins                         |
| 67900 | 29   | 218.1  | 113.9  | 99.7   | 84.8   | 89/95   | 80/88  | 90/96   | putative RNA polymerase ECF-subfamily sigma factor                     | 3.5.2 regulation                                      |
| 68580 | -63  | 5794.0 | 2461.9 | 3399.5 | 3162.6 | 93/96   | 91/94  | 87/91   | hypothetical protein                                                   | 5 similar to unknown proteins                         |
| 68920 | -88  | 313.8  | 58.7   | 115.5  | 110.9  | 94/97   | 79/85  | 84/92   | putative ATP-binding protein                                           | 4.6 miscellaneous                                     |
| 69180 | -56  | 109.8  | 117.5  | 103.6  | 18.4   | 87/93   | 78/89  | 77/88   | putative luciferase-like monooxygenase                                 | 4.6 miscellaneous                                     |
| 69190 | -15  | 89.7   | 49.3   | 20.0   | 10.6   | 85/92   | 75/84  | 75/87   | hypothetical protein                                                   | 5 similar to unknown proteins                         |
| 69270 | -88  | 70.9   | 63.4   | 48.6   | 62.2   | 88/93   | 86/93  | 85/93   | hypothetical protein of radical SAM superfamily                        | 5 similar to unknown proteins                         |
| 69280 | -40  | 6.5    | 5.0    | 2.7    | 1.3    | -       | -      | 43/60   | hypothetical protein                                                   | 5 similar to unknown proteins                         |
| 71280 | -68  | 775.6  | 4.1    | 1.8    | 1.7    | 49/66   | 82/89  | 88/92   | putative cellobiose ABC transporter solute-binding protein             | 1.2 transport / binding protein & lipoprotein         |
| 71290 | -90  | 151.6  | 50.2   | 36.5   | 20.4   | 91/96   | 80/89  | 83/92   | putative LacI-family transcriptional regulator                         | 3.5.2 regulation                                      |
| 71450 | -55  | 41.6   | 198.5  | 97.6   | 42.9   | 85/88   | 76/88  | 80/91   | hypothetical protein                                                   | 5 similar to unknown proteins                         |
| 71970 | 5    | 601.5  | 345.6  | 379.1  | 103.2  | 93/99   | 97/99  | 95/95   | putative F-type proton-transporting ATPase C chain (AtpE)              | 1.4 membrane bioenergetics                            |
| 72310 | -27  | 36.8   | 23.0   | 16.2   | 5.7    | -       | -      | 57/71   | putative capsular polysaccharide synthesis protein                     | 1.1 cell wall / transformation & competence           |
| 72380 | -17  | 479.9  | 417.0  | 273.0  | 196.7  | 97/99   | 93/95  | 94/96   | hypothetical protein containing STAS domain                            | 5 similar to unknown proteins                         |
| 72710 | -29  | 17.8   | 7.9    | 5.5    | 5.1    | 71/80   | 57/66  | 62/72   | hypothetical protein                                                   | 5 similar to unknown proteins                         |
| 72910 | -59  | 1109.9 | 1044.8 | 1349.8 | 463.4  | 98/98   | 96/98  | 96/96   | putative WhiB-family transcriptional regulator                         | 3.5.2 regulation                                      |
| 72950 | -121 | 204.1  | 278.9  | 539.9  | 216.9  | 91/96   | 89/95  | 87/94   | putative nitrite/sulphite reductase                                    | 2.7 metabolism of sulfur                              |
| 73200 | -132 | 61.9   | 22.4   | 26.4   | 23.9   | 85/91   | 60/78  | 66/76   | hypothetical protein                                                   | 5 similar to unknown proteins                         |
| 73970 | -167 | 145.1  | 67.2   | 56.0   | 58.6   | 86/92   | 78/87  | 80/89   | hypothetical protein                                                   | 5 similar to unknown proteins                         |
| 74540 | -41  | 126.5  | 125.0  | 92.8   | 73.4   | 93/95   | 88/93  | 89/94   | putative dihydrolipoamide dehydrogenase                                | 2.1.2 main glycolytic pathways                        |
| 74550 | -1   | 107.2  | 121.0  | 87.2   | 61.4   | 91/97   | 88/98  | 92/96   | hypothetical protein                                                   | 5 similar to unknown proteins                         |
| 74660 | -114 | 75.9   | 58.3   | 55.0   | 55.5   | 35/52   | 61/73  | 60/74   | putative CDP-glycerol:polyglycerol phosphate glycerophosphotransferase | 2.4 metabolism of lipids                              |

|       |      |        |        |        |        |        |       |        |                                                                                |                                                     |
|-------|------|--------|--------|--------|--------|--------|-------|--------|--------------------------------------------------------------------------------|-----------------------------------------------------|
| 74670 | 20   | 32.7   | 21.5   | 22.1   | 16.0   | 72/87  | 81/89 | 81/91  | putative NUDIX hydrolase                                                       | 4.6 miscellaneous                                   |
| 75120 | -76  | 17.7   | 26.5   | 10.4   | 4.3    | 83/92  | 78/85 | 82/89  | putative deoxyribonuclease                                                     | 2.3 metabolism of nucleotides and nucleic acids     |
| 75130 | -8   | 20.7   | 4.4    | 3.2    | 1.8    | 86/92  | 75/87 | 77/88  | hypothetical protein                                                           | 6 no similarity                                     |
| 75440 | -74  | 827.1  | 971.1  | 685.0  | 132.5  | -      | 92/94 | 92/94  | hypothetical protein                                                           | 5 similar to unknown proteins                       |
| 75470 | -17  | 957.5  | 2386.2 | 2421.0 | 2240.1 | 93/96  | 83/92 | 86/94  | putative thioredoxin                                                           | 3.5.2 regulation                                    |
| 76110 | -35  | 13.5   | 1106.2 | 953.9  | 394.8  | 69/76  | 56/68 | 52/65  | hypothetical protein                                                           | 5 similar to unknown proteins                       |
| 76150 | -110 | 24.8   | 8512.2 | 8649.3 | 2880.4 | 88/95  | 79/90 | 74/86  | putative flagellar assembly protein                                            | 1.1 cell wall / transformation & competence         |
| 76910 | -112 | 42.5   | 150.9  | 92.6   | 46.8   | 74/82  | 78/85 | 79/86  | putative phosphate ABC transporter substrate-binding protein (FliW)            | 1.2 transport / binding protein & lipoprotein       |
| 77370 | 41   | 14.9   | 6.8    | 6.7    | 5.8    | 60/73  | 45/58 | 37/52  | putative AfsR-family transcriptional regulator                                 | 3.5.2 regulation                                    |
| 77530 | -52  | 3812.9 | 3251.4 | 3757.6 | 2565.3 | 100/10 | 99/99 | 98/99  | hypothetical protein                                                           | 5 similar to unknown proteins                       |
| 77540 | -150 | 137.6  | 290.8  | 258.8  | 106.9  | 65/78  | 59/69 | 64/74  | hypothetical protein                                                           | 5 similar to unknown proteins                       |
| 77620 | -89  | 163.1  | 82.8   | 100.0  | 34.9   | 98/99  | 96/97 | 97/99  | hypothetical protein                                                           | 5 similar to unknown proteins                       |
| 77890 | -67  | 340.3  | 296.5  | 175.4  | 54.7   | 81/88  | 73/82 | 76/81  | hypothetical protein                                                           | 5 similar to unknown proteins                       |
| 78120 | -143 | 95.0   | 63.4   | 34.4   | 28.9   | 71/81  | 70/81 | 71/83  | putative subtilase-family protease                                             | 4.6 miscellaneous                                   |
| 78170 | -98  | 75.9   | 7.5    | 7.8    | 8.0    | 70/83  | 76/86 | 80/89  | putative capsule synthesis protein                                             | 1.1 cell wall / transformation & competence         |
| 78180 | -87  | 244.4  | 257.1  | 139.7  | 68.4   | 100/10 | 96/99 | 98/100 | putative transcriptional regulator containing cyclic nucleotide-binding domain | 3.5.2 regulation                                    |
| 78290 | -41  | 42.3   | 1675.1 | 1362.2 | 2569.4 | 97/99  | 98/99 | 98/99  | putative WhiB-family transcriptional regulator                                 | 3.5.2 regulation                                    |
| 78690 | -136 | 170.0  | 40.5   | 31.2   | 17.3   | 61/73  | 56/71 | 52/65  | hypothetical protein                                                           | 5 similar to unknown proteins                       |
| 78840 | -43  | 117.9  | 24.1   | 38.7   | 111.9  | 65/77  | 61/74 | 63/75  | putative diguanylate cyclase                                                   | 1.3 sensor                                          |
| 78870 | 11   | 124.8  | 14.2   | 36.3   | 18.1   | 60/76  | 51/70 | 49/68  | hypothetical protein                                                           | 6 no similarity                                     |
| 78880 | -43  | 165.3  | 51.8   | 61.4   | 27.6   | 97/97  | 81/85 | 84/89  | hypothetical protein                                                           | 5 similar to unknown proteins                       |
| 78890 | -44  | 236.8  | 83.7   | 85.1   | 48.4   | 88/93  | 87/93 | 86/92  | putative DNA-binding protein                                                   | 3.5.2 regulation                                    |
| 78900 | 26   | 1119.1 | 115.2  | 212.0  | 97.2   | 85/87  | 80/87 | 80/85  | hypothetical protein                                                           | 6 no similarity                                     |
| 79410 | -57  | 19.4   | 15.5   | 12.6   | 16.6   | 41/54  | 31/49 | 35/51  | putative TetR-family transcriptional regulator                                 | 3.5.2 regulation                                    |
| 79420 | -22  | 3.2    | 2.6    | 2.3    | 2.1    | 38/49  | 37/52 | 56/75  | putative short chain dehydrogenase                                             | 4.6 miscellaneous                                   |
| 79970 | -102 | 96.0   | 62.0   | 61.1   | 23.7   | 87/93  | 79/87 | 79/88  | putative polypeptide deformylase                                               | 2.2 metabolism of amino acids and related molecules |
| 80800 | -181 | 49.8   | 24.2   | 12.6   | 5.6    | 84/86  | 81/90 | 80/90  | putative molybdopterin biosynthesis protein C                                  | 2.5 metabolism of coenzymes                         |
| 80810 | -95  | 55.6   | 36.5   | 25.0   | 9.6    | 75/83  | 56/69 | 58/72  | putative diguanylate cyclase/phosphodiesterase                                 | 1.3 sensor                                          |
| 80840 | -140 | 66.7   | 17.8   | 14.1   | 41.5   | 77/86  | 40/65 | 46/67  | hypothetical protein                                                           | 5 similar to unknown proteins                       |
| 80970 | -53  | 253.6  | 146.1  | 135.2  | 97.9   | 80/87  | 74/89 | 79/89  | hypothetical protein                                                           | 5 similar to unknown proteins                       |
| 80980 | -74  | 810.8  | 325.9  | 195.4  | 134.4  | 85/90  | 87/92 | 87/94  | putative PadR-like family transcriptional regulator                            | 3.5.2 regulation                                    |
| 81090 | -70  | 24.2   | 23.7   | 21.5   | 9.7    | 75/83  | 72/83 | 64/72  | putative RNA polymerase ECF-subfamily sigma factor                             | 3.5.2 regulation                                    |
